# Supplementary material for: Tuneable reduction of CO2 – organocatalyzed selective formylation and methylation of amines
Source: Royal Society of Chemistry journal article supplement (doi:10.1039/d3gc03993e), 2023-11-23
Supplement: d3gc03993e1.pdf [file d3gc03993e1.pdf]

## Supporting Information

### **Tuneable Reduction of CO<sub>2</sub> – Organocatalyzed Selective Formylation and Methylation of Amines**

Changyue Ren, Constanza Terazzi and Thomas Werner\*

*<sup>a</sup>. Leibniz Institute for Catalysis e.V. at the University of Rostock, Albert Einstein-Straße 29a, 18059 Rostock, Germany. E-mail: Thomas.Werner@catalysis.de*

*<sup>b</sup>. College of Pharmacy, Zunyi Medical University, Zunyi 563003, China.*

*<sup>c</sup>. Department of Chemistry, Paderborn University, Warburger Str. 100, D-33098 Paderborn, Germany. E-mail: th.werner@uni-paderborn.de*

## CONTENT

|                                                    |                  |
|----------------------------------------------------|------------------|
| <b>1. General considerations</b>                   | <b>S2</b>        |
| <b>2. Synthesis of phosphonium salt catalyst</b>   | <b>S2 – S6</b>   |
| <b>3. Synthesis of methylated amines</b>           | <b>S6 – S16</b>  |
| <b>4. Synthesis of formylated amines</b>           | <b>S16 – S26</b> |
| <b>5. Synthesis of benzoheterocyclic compounds</b> | <b>S26 – S29</b> |
| <b>6. mechanistic study</b>                        | <b>S30 – S32</b> |
| <b>7. References</b>                               | <b>S33</b>       |

## 1. General considerations

All chemicals were purchased from commercial sources in purities of  $\geq 95\%$  and used without further purification. Carbon dioxide (99.998%) was obtained from Linde AG. Methyltriphenylphosphonium methylcarbonate salt was purchased from Sigma-Aldrich. Polymethylhydrosiloxane (PMHS) was purchased from Sigma-Aldrich (viscosity 15–40 mPa·s). Deuterated solvents were ordered from Deutero GmbH and stored over molecular sieves. Reactions were performed in a 45 cm<sup>3</sup> stainless-steel autoclave from Parr Instrument Company. The reactions were conducted with 5000 Multi Reactor System (MRS) from Parr Instrument Company. The pressure was adjusted using a pressure regulator LMD50003 from Druva and monitored with the MRS-system using ASHCROFT Type G2 pressure transducer. NMR spectra were received using Bruker 300 Fourier, Bruker AV 300 and Bruker AV 400 spectrometers. Chemical shifts are reported in ppm relative to the residue solvent peak in deuterated solvent. Coupling constants are expressed in Hertz (Hz). The following abbreviations are used: s = singlet, d = doublet, t = triplet and m = multiplet. NMR yields were determined by using mesitylene as internal standard. Gas chromatography was performed on Agilent 7890A GC System, mass spectra were measured on downstream 5975C inert XL MSD mass detector also from Agilent. LC-MS was performed on Waters Acquity UPLC H-Class/Xevo G2-XS TOF LC-MS. Elemental analysis was performed on a TruSpec CHMS Micro from Leco. Thin layer chromatography was performed on Merck TLC plates with fluorescence indication (silica type 60, F254), spots were visualized using UV-light. Flash chromatography was performed using silica with a grain size of 40–63  $\mu\text{m}$  from Macherey-Nagel.

## 2. Synthesis of methyltriphenylphosphonium methylcarbonate salt catalyst<sup>1</sup>

In a 10 mL Schlenk tube, dimethylcarbonate (DMC) (0.52 mL, 6.15 mmol), triphenylphosphine (0.235 g, 0.896 mmol) and methanol (0.52 mL) as solvent were introduced in the shortest time possible to limit the exposure of the phosphine to air. The Schlenk tube was heated for 24 hours at 140 °C under magnetic stirring. Afterwards, the reaction mixture was allowed to cool to ambient temperature. The homogeneous pale-yellow solution was transferred to a round-bottomed flask and volatiles were removed from the mixture by rotary evaporation at 40 °C. The off-white solid was stirred under inert atmosphere with cyclohexane (8.3 mL), at 50 °C for 2 hours. After filtration on a Gooch crucible the product was obtained in 64% as a colorless solid (0.215 mg, 0.580 mmol). <sup>1</sup>H NMR (300 MHz, CDCl<sub>3</sub>):  $\delta$  = 7.82 – 7.58 (m, 15H), 3.37 (s, 3H) ppm. The missing H signal of P-CH<sub>3</sub> is due to H/D exchange with CDCl<sub>3</sub>. <sup>1</sup>H NMR (300 MHz, CD<sub>3</sub>CN):  $\delta$  7.98 – 7.81 (m, 3H), 7.79 – 7.62 (m, 12H), 3.29 (s, 3H), 2.89 (d, *J* = 15.7 Hz, 3H). <sup>13</sup>C NMR (75 MHz, CDCl<sub>3</sub>):  $\delta$  134.96 (d, *J* = 2.9 Hz), 133.26 (d, *J* = 10.7 Hz), 130.39 (d, *J* = 12.9 Hz), 119.41 (d, *J* = 88.5 Hz), 52.20. <sup>13</sup>C NMR (75 MHz, CD<sub>3</sub>CN):  $\delta$  = 162.20, 140.32 (d, *J* = 3.1 Hz), 138.68 (d, *J* = 10.8 Hz), 135.47 (d, *J* = 12.9 Hz), 124.98 (d, *J* = 88.9 Hz), 56.17, 13.50 (d, *J* = 57.8 Hz) ppm. <sup>31</sup>P NMR (122 MHz, CDCl<sub>3</sub>):  $\delta$  = 21.92 ppm. HR-MS (MePh<sub>3</sub>P<sup>+</sup>): *m/z* calcd 277.1151 g/mol, found 277.1153 g/mol.

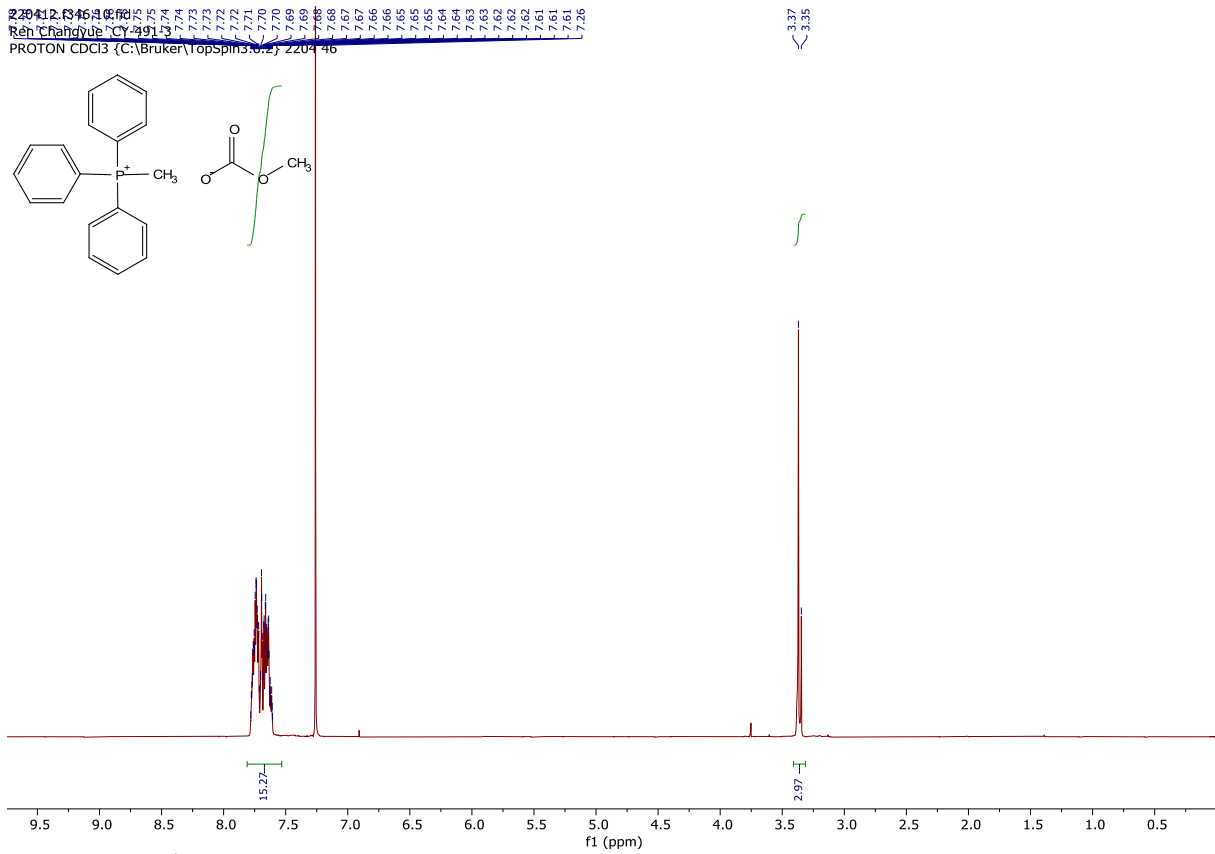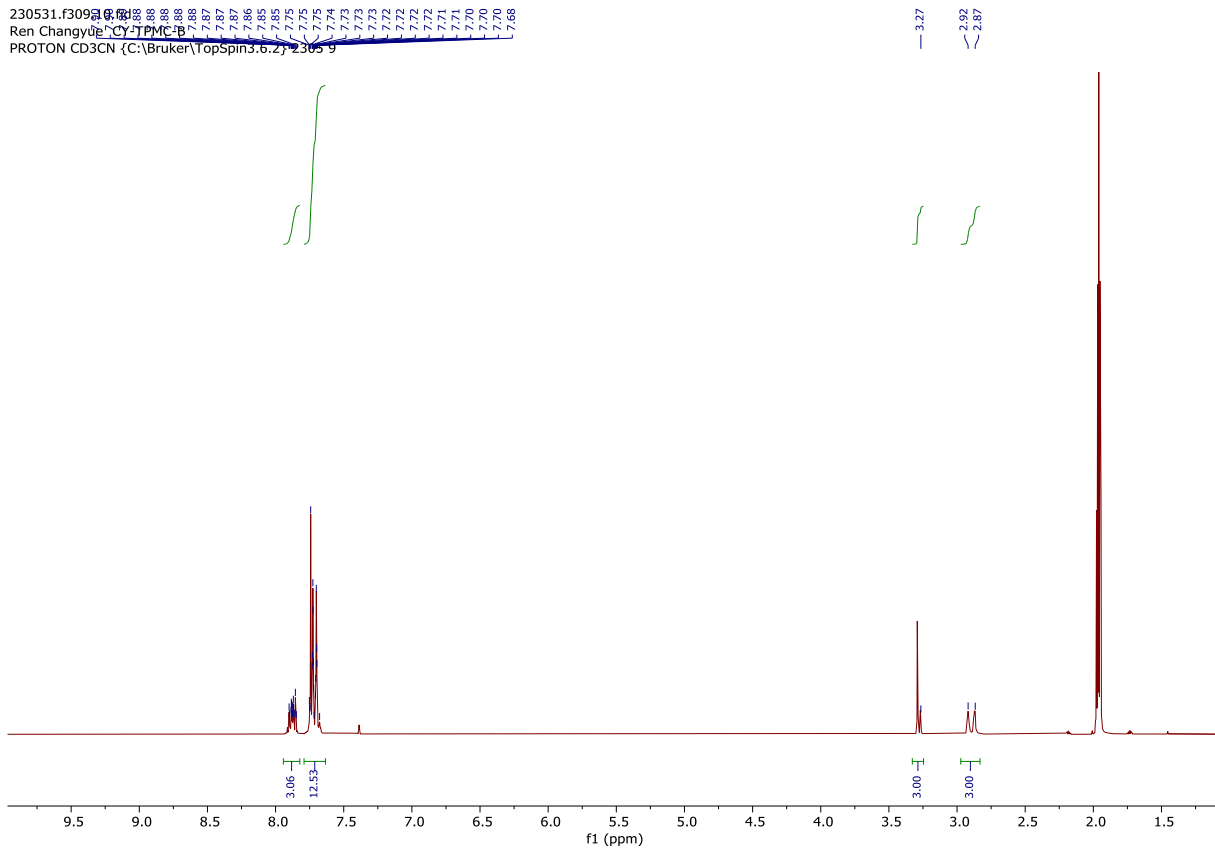

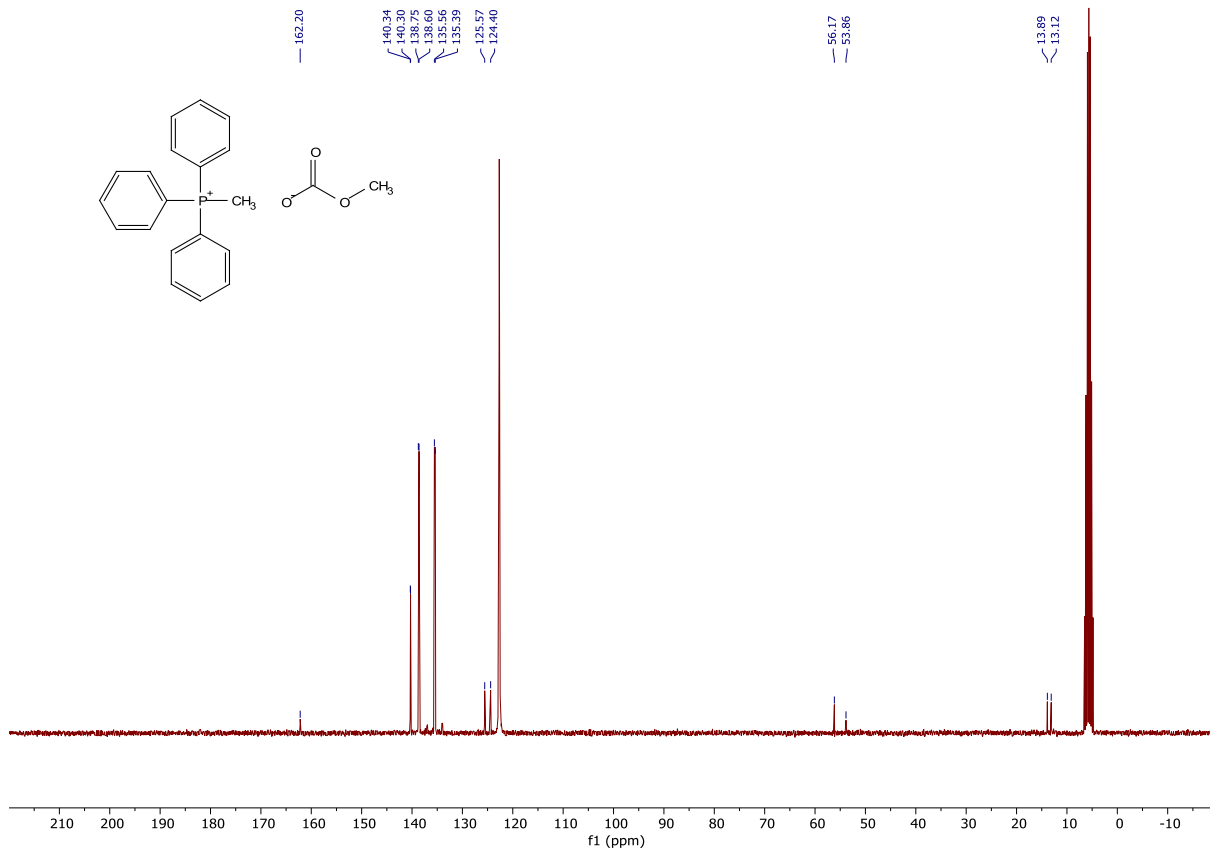

<sup>13</sup>C NMR of methyltriphenylphosphonium methylcarbonate in CD<sub>3</sub>CN

220616.f301.11.fid  
 Ren/ CY-TPMC  
 C13CPD CDCl3 {C:\Bruker\TopSpin3.6.2} 2206 1

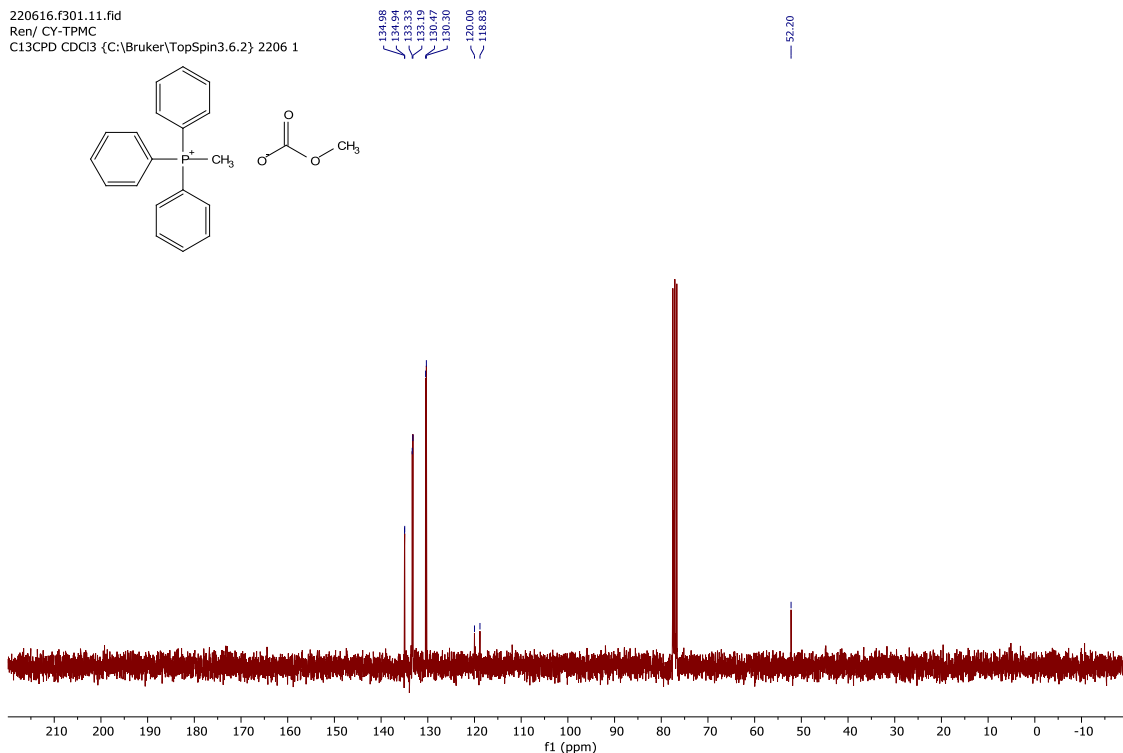

<sup>13</sup>C NMR of methyltriphenylphosphonium methylcarbonate in CDCl<sub>3</sub>

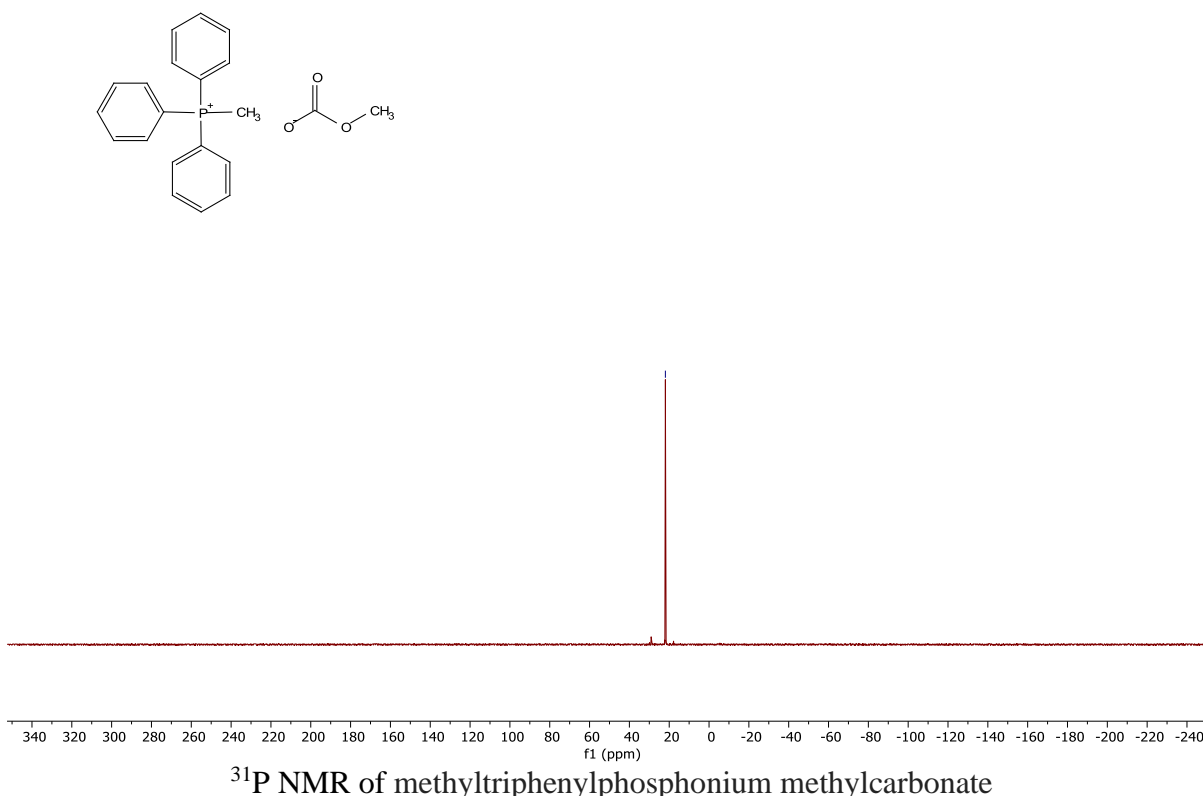

### 3. Synthesis of methylated amines 2

**General procedure (GP1) for the synthesis of methylated amines 2:** A 45 cm<sup>3</sup> stainless-steel autoclave was charged with catalyst (10 mol%) and aniline **1** (0.600 mmol), PMHS (414 μL), THF 5 mL. The autoclave was purged with CO<sub>2</sub> and the pressure kept constant at 1.0 bar. The reaction mixture was stirred at 70 °C for 4–16 h. Subsequently the CO<sub>2</sub> was released slowly. The solvent was removed under reduced pressure. The residue was purified by silica gel chromatography (hexane/ethyl acetate = 20/1) to afford the corresponding products. <sup>1</sup>H NMR yields were determined by using mesitylene as the internal standard.

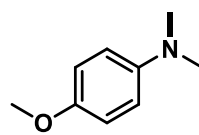 According to the GP1, 4-methoxy-*N*-methylaniline (**1b**, 82.7 mg, 0.600 mmol), catalyst (21.4 mg, 60.0 μmol), PMHS (414 μL) and THF 5 mL and CO<sub>2</sub> were converted at 70 °C, 1.0 bar for 16 h to yield 4-methoxy-*N,N*-dimethylaniline (**2b**) (54.6 mg, 0.361 mmol, 60%) as a colorless oil. <sup>1</sup>H NMR (300 MHz, CDCl<sub>3</sub>) δ 6.93 – 6.73 (m, 4H), 3.77 (s, 3H), 2.88 (s, 6H).<sup>[2]</sup>

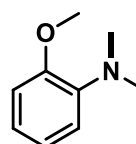 According to the GP1, 2-methoxy-*N*-methylaniline (**1c**, 82.7 mg, 0.600 mmol), catalyst (21.4 mg, 60.0 μmol), PMHS (414 μL) and THF 5 mL and CO<sub>2</sub> were converted at 70 °C, 1.0 bar for 4 h to yield 2-methoxy-*N,N*-dimethylaniline (**2c**) (64.2 mg, 0.425 mmol, 71%) as a colorless oil. <sup>1</sup>H NMR (300 MHz, CDCl<sub>3</sub>) δ 7.05 – 6.83 (m, 4H), 3.89 (s, 3H), 2.80 (s, 6H).<sup>[2]</sup>

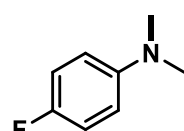 According to the GP1, 4-fluoro-*N*-methylaniline (**1d**, 73.8 mg, 0.600 mmol), catalyst (21.4 mg, 60.0 μmol), PMHS (414 μL) and THF 5 mL and CO<sub>2</sub> were converted at 70 °C, 1.0 bar for 16 h to yield 4-fluoro-*N,N*-dimethylaniline (**2d**) (72.0 mg, 0.517 mmol, 86%) as a colorless oil. <sup>1</sup>H NMR (300 MHz, CDCl<sub>3</sub>) δ 7.05 – 6.88 (m, 2H), 6.74 (d, *J* = 5.7 Hz, 2H), 2.91 (s, 6H).<sup>[3]</sup>

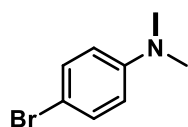

According to the GP1, 4-bromo-*N*-methylaniline (**1e**, 112 mg, 0.600 mmol), (21.4 mg, 60.0  $\mu$ mol), PMHS (414  $\mu$ L) and THF 5 mL and CO<sub>2</sub> were converted at 70 °C, 1.0 bar for 16 h to yield 4-bromo-*N,N*-dimethylaniline (**2e**) (92.8 mg, 0.464 mmol, 77%) as a colorless oil. <sup>1</sup>H NMR (300 MHz, CDCl<sub>3</sub>)  $\delta$  7.38 – 7.18 (m, 2H), 6.60 (d,  $J$  = 9.1 Hz, 2H), 2.92 (s, 6H).<sup>[2]</sup>

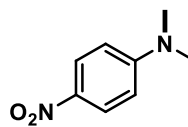

According to the GP1, 4-nitro-*N*-methylaniline (**1f**, 91.3 mg, 0.600 mmol), catalyst (21.4 mg, 60.0  $\mu$ mol), PMHS (414  $\mu$ L) and THF 5 mL and CO<sub>2</sub> were converted at 70 °C, 1.0 bar for 16 h to yield *N,N*-dimethyl-4-nitroaniline (**2f**) (19.0 mg, 0.114 mmol, 19%) as a colorless oil. <sup>1</sup>H NMR (300 MHz, CDCl<sub>3</sub>)  $\delta$  8.13 (d,  $J$  = 9.4 Hz, 2H), 6.61 (d,  $J$  = 9.5 Hz, 2H), 3.11 (s, 6H).<sup>[3]</sup>

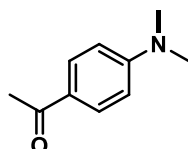

According to the GP1, 4-acetyl-*N*-methylaniline (**1g**, 89.5 mg, 0.600 mmol), catalyst (21.4 mg, 60.0  $\mu$ mol), PMHS (414  $\mu$ L) and THF 5 mL and CO<sub>2</sub> were converted at 70 °C, 1.0 bar for 16 h to yield 1-(4-(dimethylamino)phenyl)ethan-1-one (**2g**) (40.7 mg, 0.249 mmol, 42%) as a colorless oil. <sup>1</sup>H NMR (300 MHz, CD<sub>3</sub>CN)  $\delta$  7.87 (m, 2H), 6.66 (dt,  $J$  = 9.1 Hz, 2H), 3.06 (s, 6H), 2.51 (s, 3H).<sup>[2]</sup>

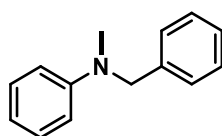

According to the GP1, *N*-benzylaniline (**1h**, 110 mg, 0.600 mmol), catalyst (21.4 mg, 60.0  $\mu$ mol), PMHS (414  $\mu$ L) and THF 5 mL and CO<sub>2</sub> were converted at 70 °C, 1.0 bar for 16 h to yield *N*-benzyl-*N*-methylaniline (**2h**) (105 mg, 0.533 mmol, 89%) as a colorless oil. <sup>1</sup>H NMR (300 MHz, CDCl<sub>3</sub>)  $\delta$  7.37 – 7.28 (m, 2H), 7.28 – 7.19 (m, 5H), 6.81 – 6.69 (m, 3H), 4.55 (s, 2H), 3.03 (s, 3H).<sup>[2]</sup>

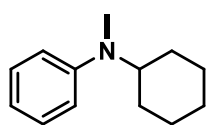

According to the GP1, *N*-cyclohexylaniline (**1i**, 105 mg, 0.600 mmol), catalyst (21.4 mg, 60.0  $\mu$ mol), PMHS (414  $\mu$ L) and THF 5 mL and CO<sub>2</sub> were converted at 70 °C, 1.0 bar for 16 h to yield *N*-cyclohexyl-*N*-methylaniline (**2i**) (94.8 mg, 0.501 mmol, 89%) as a colorless oil. <sup>1</sup>H NMR (400 MHz, CDCl<sub>3</sub>)  $\delta$  7.33 – 7.15 (m, 2H), 6.87 – 6.61 (m, 3H), 3.56 (ddt,  $J$  = 11.2, 6.6, 3.4 Hz, 1H), 2.79 (s, 3H), 1.93 – 1.63 (m, 5H), 1.53 – 1.29 (m, 4H), 1.21 – 1.06 (m, 1H).<sup>[2]</sup>

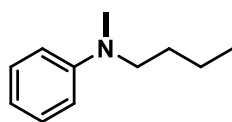

According to the GP1, *N*-butylaniline (**1j**, 89.5 mg, 0.600 mmol), catalyst (21.4 mg, 60.0  $\mu$ mol), PMHS (414  $\mu$ L) and THF 5 mL and CO<sub>2</sub> were converted at 70 °C, 1.0 bar for 16 h to yield *N*-butyl-*N*-methylaniline (**2j**) (85.1 mg, 0.521 mmol, 87%) as a colorless oil. <sup>1</sup>H NMR (300 MHz, CDCl<sub>3</sub>)  $\delta$  7.30 – 7.19 (m, 2H), 6.70 (t,  $J$  = 6.6 Hz, 3H), 3.40 – 3.28 (m, 2H), 2.94 (s, 3H), 1.68 – 1.50 (m, 2H), 1.45 – 1.28 (m, 2H), 1.07 – 0.88 (m, 3H).<sup>[2]</sup>

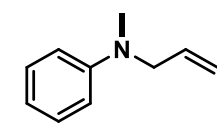

According to the GP1, *N*-allylaniline (**1k**, 80.0 mg, 0.600 mmol), catalyst (21.4 mg, 60.0  $\mu$ mol), PMHS (414  $\mu$ L) and THF 5 mL and CO<sub>2</sub> were converted at 70 °C, 1.0 bar for 16 h to yield *N*-allyl-*N*-methylaniline (**2k**) (72.8 mg, 0.494 mmol, 82%) as a colorless oil. <sup>1</sup>H NMR (300 MHz, CDCl<sub>3</sub>)  $\delta$  7.15 (dd,  $J$  = 8.9, 7.2 Hz, 2H), 6.74 – 6.51 (m, 3H), 5.92 – 5.66 (m, 1H), 5.19 – 4.94 (m, 2H), 3.84 (dt,  $J$  = 5.1, 1.7 Hz, 2H), 2.86 (s, 3H).<sup>[2]</sup>

220511.344.10.fid  
Ren Changyue, CY-515  
Au1H CDCl3 {C:\Bruker\TopSpin3.6.2} 2205 44

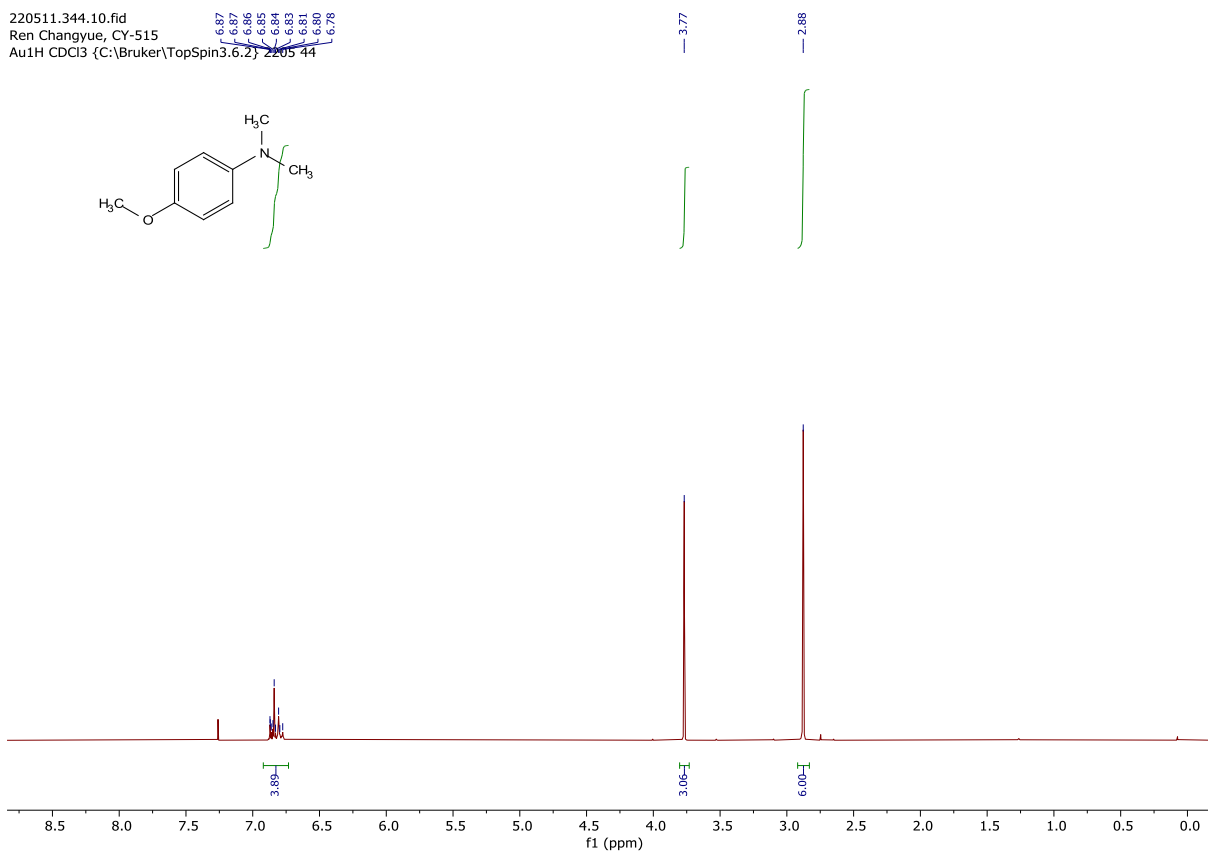

<sup>1</sup>H NMR of 4-methoxy-*N,N*-dimethylaniline (**2b**)

220504.583.10.fid  
Ren Changyue, CY-516  
PROTON CDCl3 {C:\Bruker\TopSpin3.6.2} 2205 48

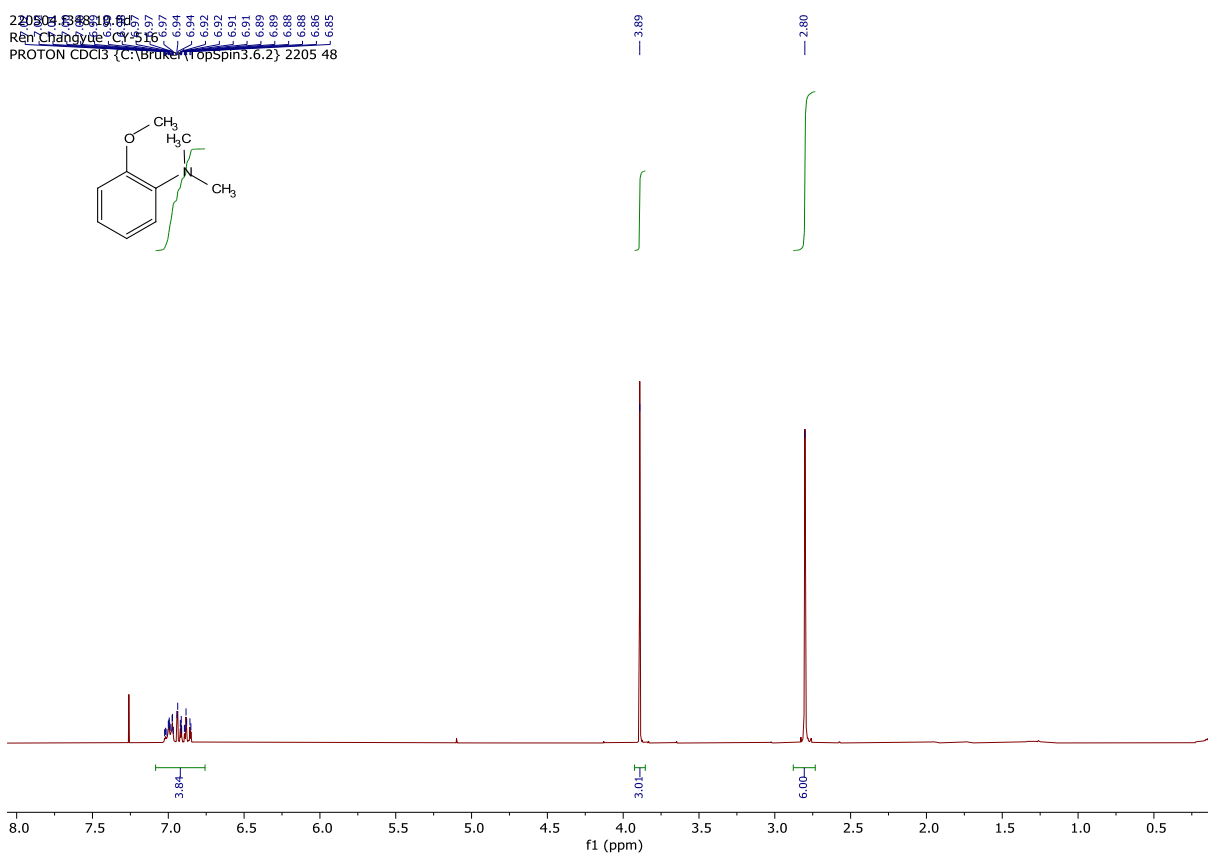

<sup>1</sup>H NMR of 2-methoxy-*N,N*-dimethylaniline (**2c**)



220515.301.10.fid  
Ren Changyue, CY-512-2  
Au1H CDCl3 {C:\Bruker\TopSpin3.6.2} 2205 1

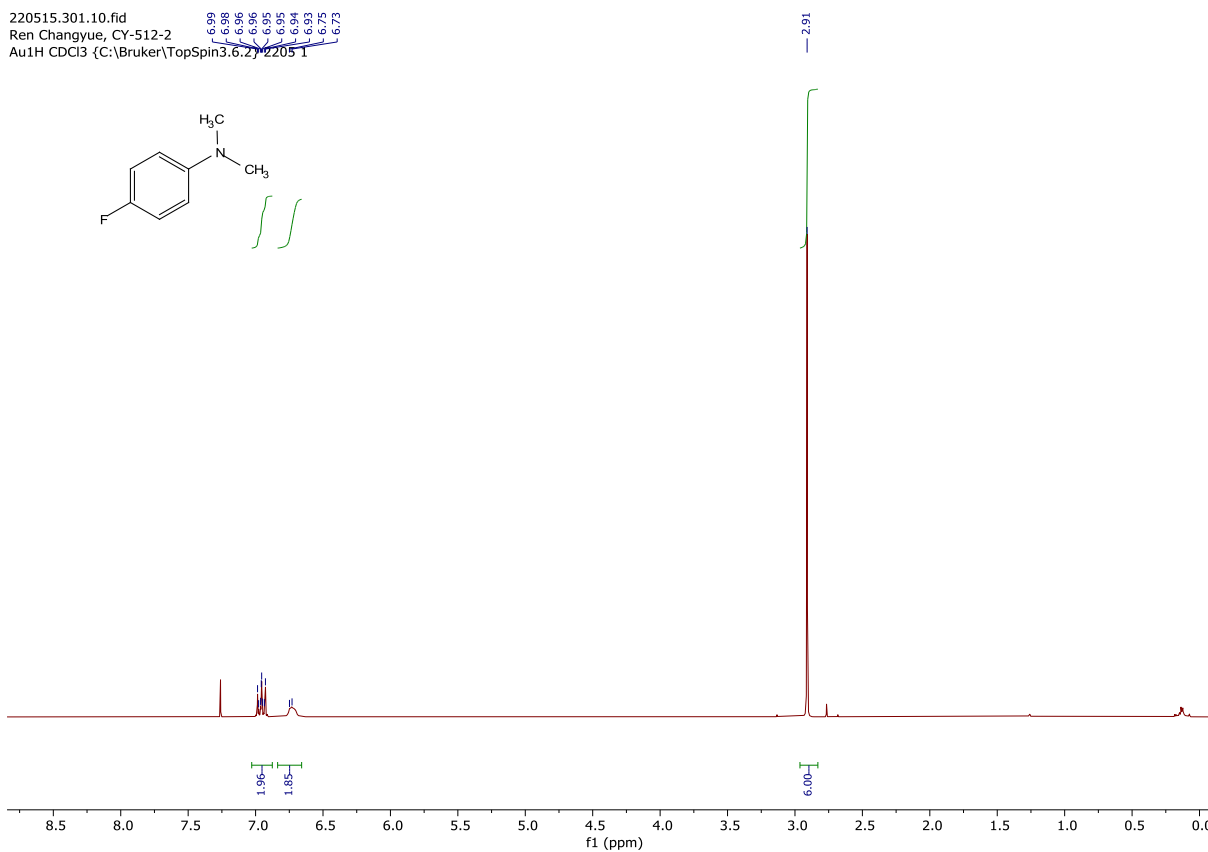

<sup>1</sup>H NMR of 4-fluoro-*N,N*-dimethylaniline (**2d**)

220921.f324.10.fid  
Ren Changyue, CY-522  
PROTON CDCl3 {C:\Bruker\TopSpin3.6.2} 2209 24

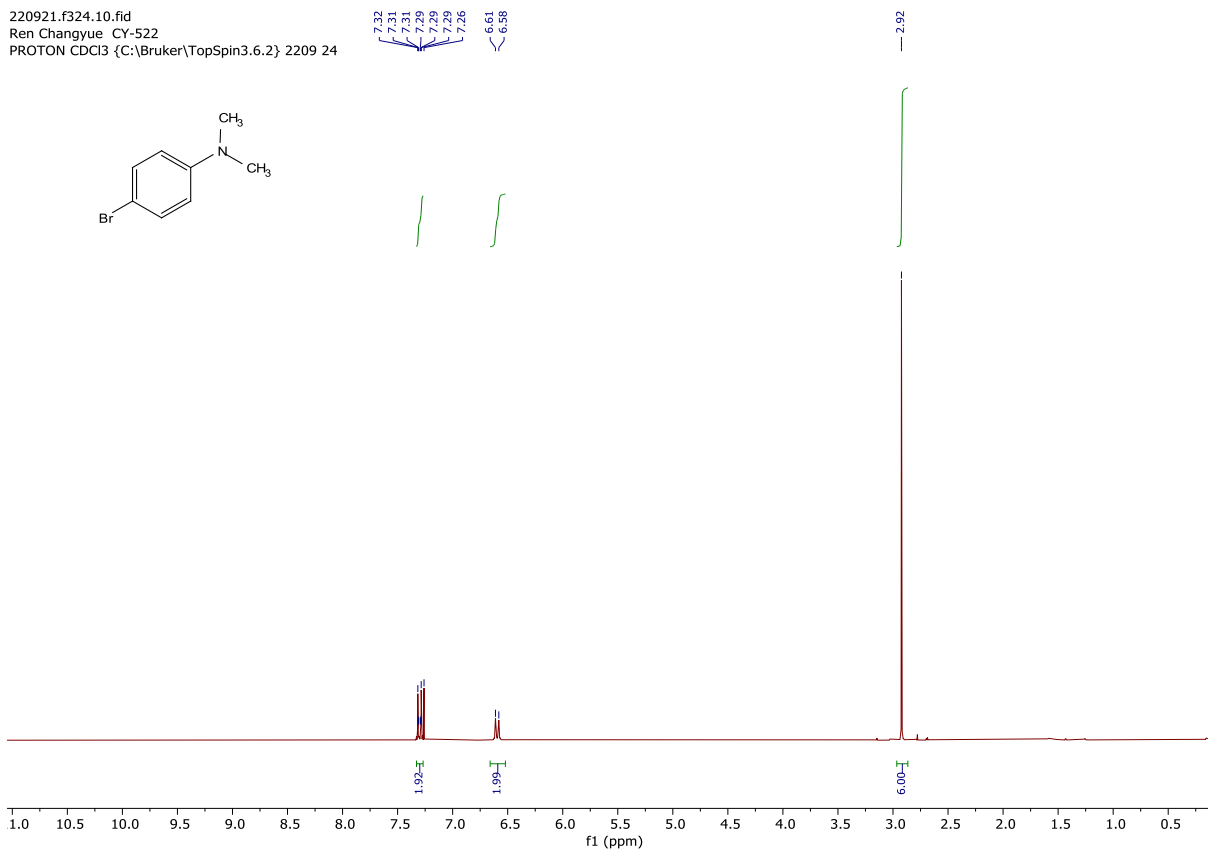

<sup>1</sup>H NMR of 4-bromo-*N,N*-dimethylaniline (**2e**)

221111.329.10.fid  
Ren/ CY-596  
Au1H CDCl3 {C:\Bruker\TopSpin3.6.2} 22111 29

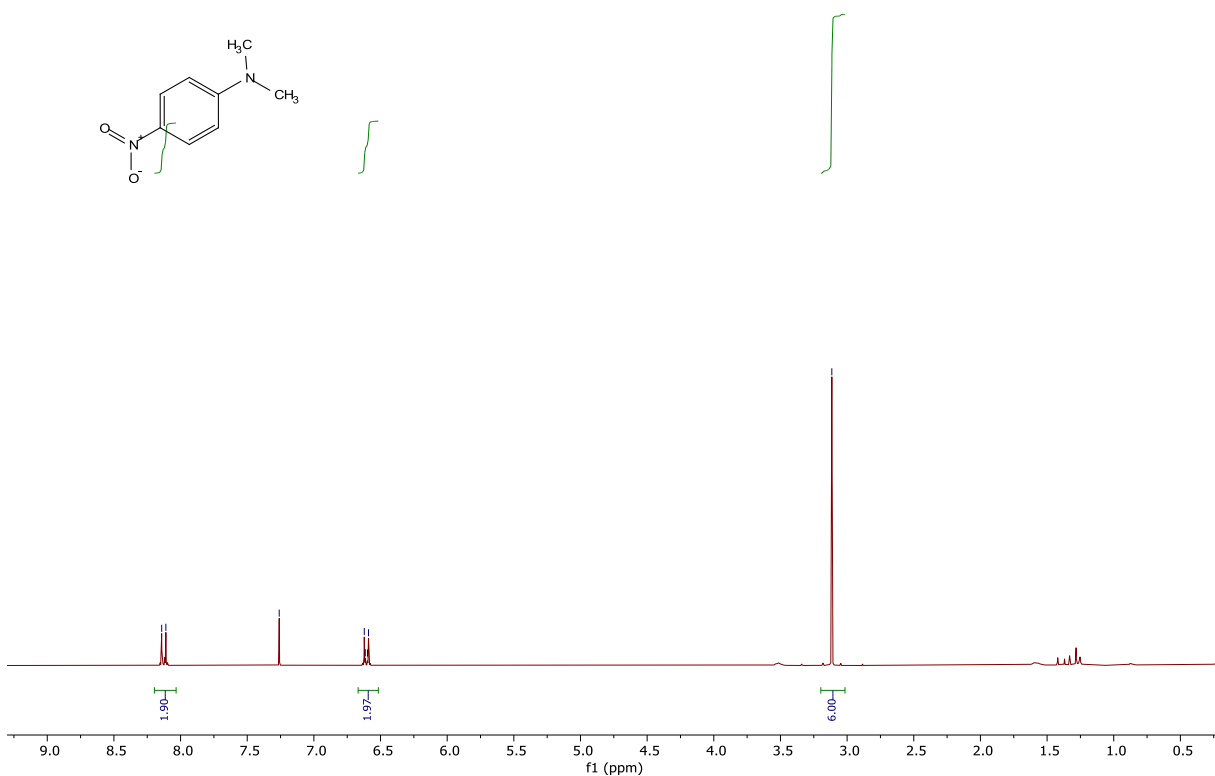

<sup>1</sup>H NMR of *N,N*-dimethyl-4-nitroaniline (**2f**)

220926.f308.10.fid  
Ren Changyue  
PROTON CD3CN {C:\Bruker\TopSpin3.6.2} 2209 8

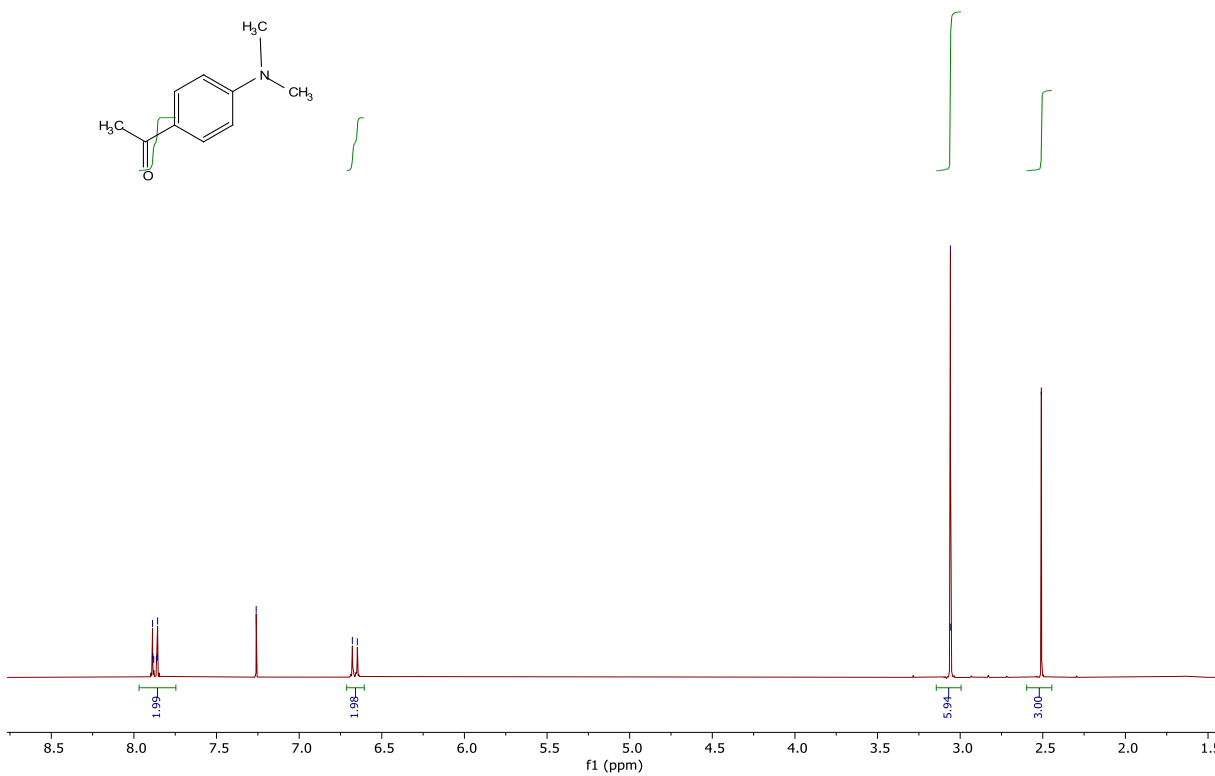

<sup>1</sup>H NMR of 1-(4-(dimethylamino)phenyl)ethan-1-one (**2g**)

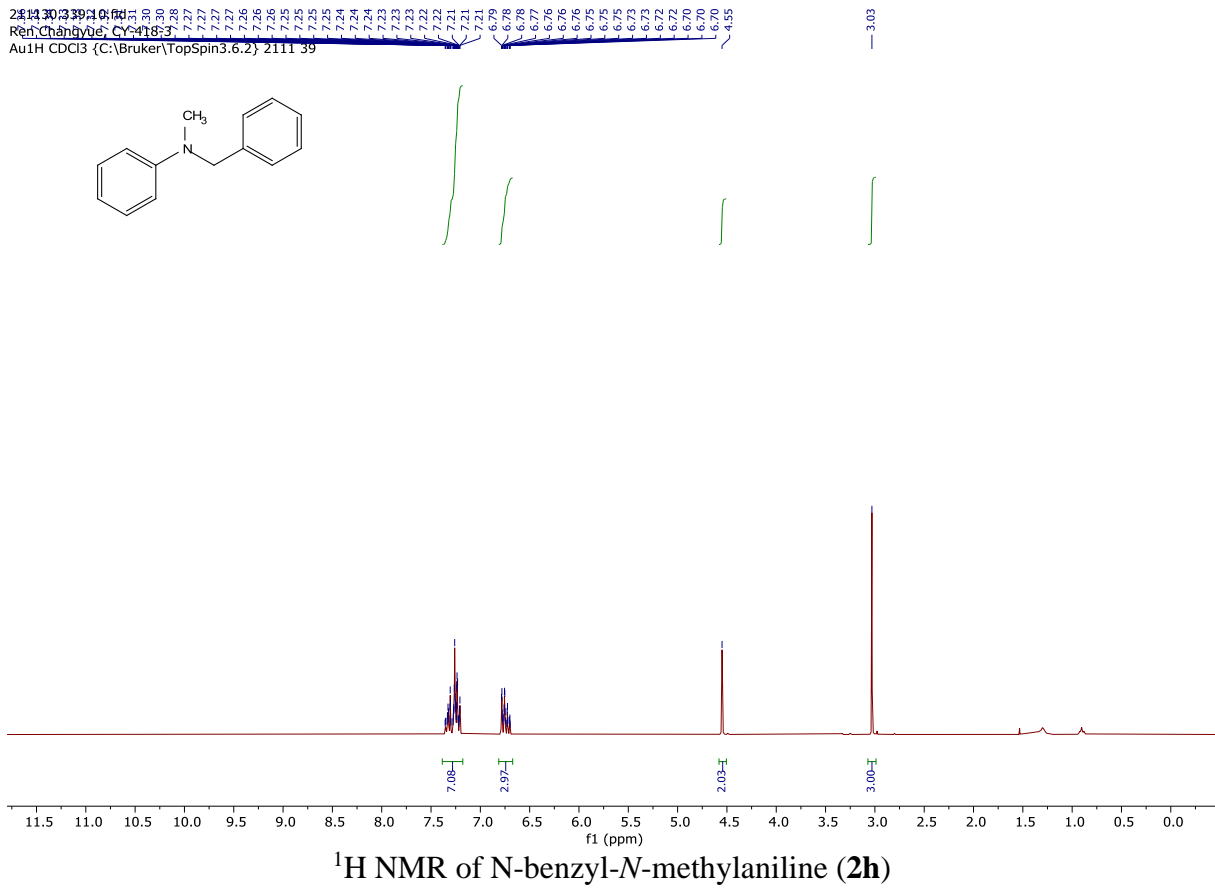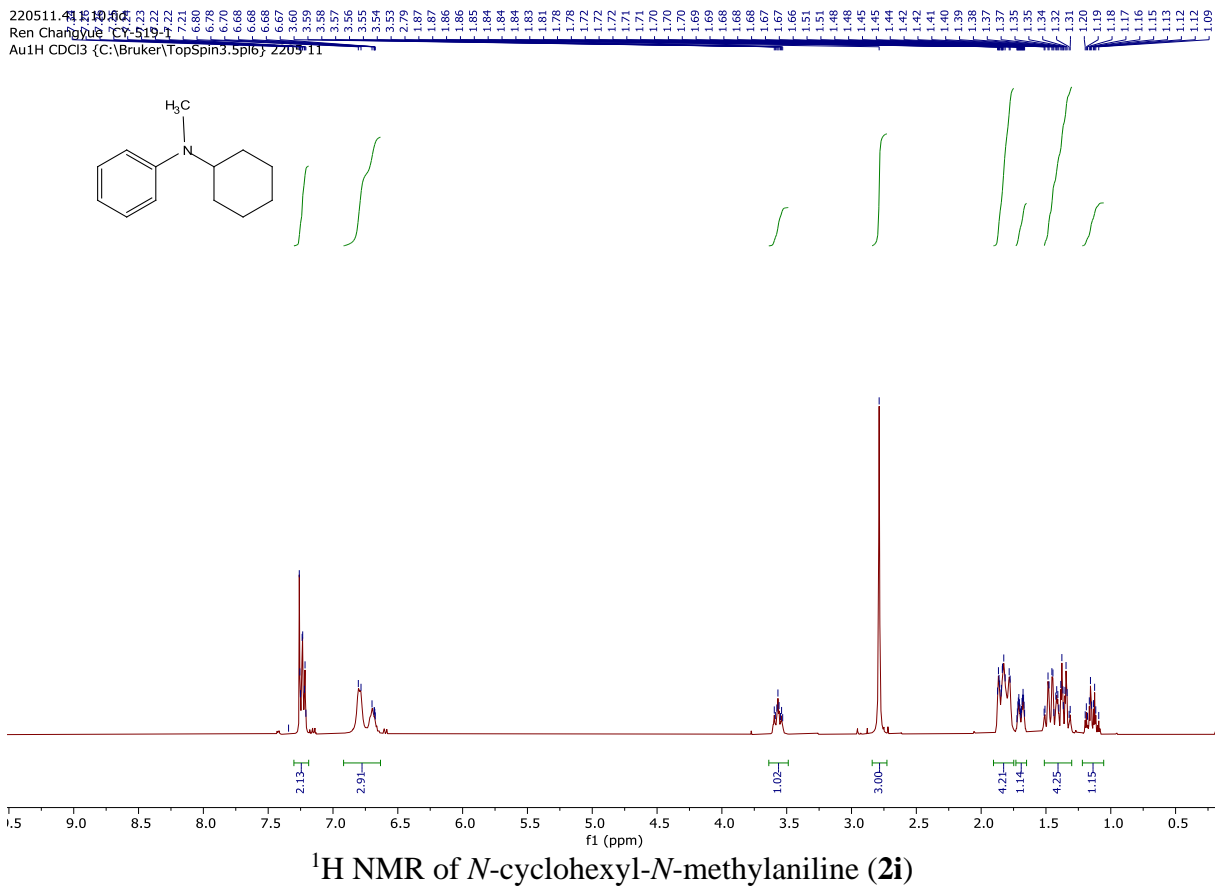

220127.337.10.fid  
 Ren Changyue, CY-Re3  
 Au1H CDCl3 {C:\Bruker\TopSpin3.6.2} 2201.37

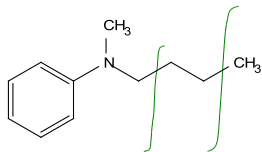

3.34  
3.32  
3.32  
3.29  
2.94  
1.60  
1.59  
1.59  
1.58  
1.57  
1.55  
1.55  
1.55  
1.54  
1.54  
1.52  
1.42  
1.40  
1.39  
1.37  
1.37  
1.37  
1.36  
1.35  
1.35  
1.34  
1.34  
1.32  
1.32  
1.32  
1.28  
1.28  
0.96  
0.93  
0.93

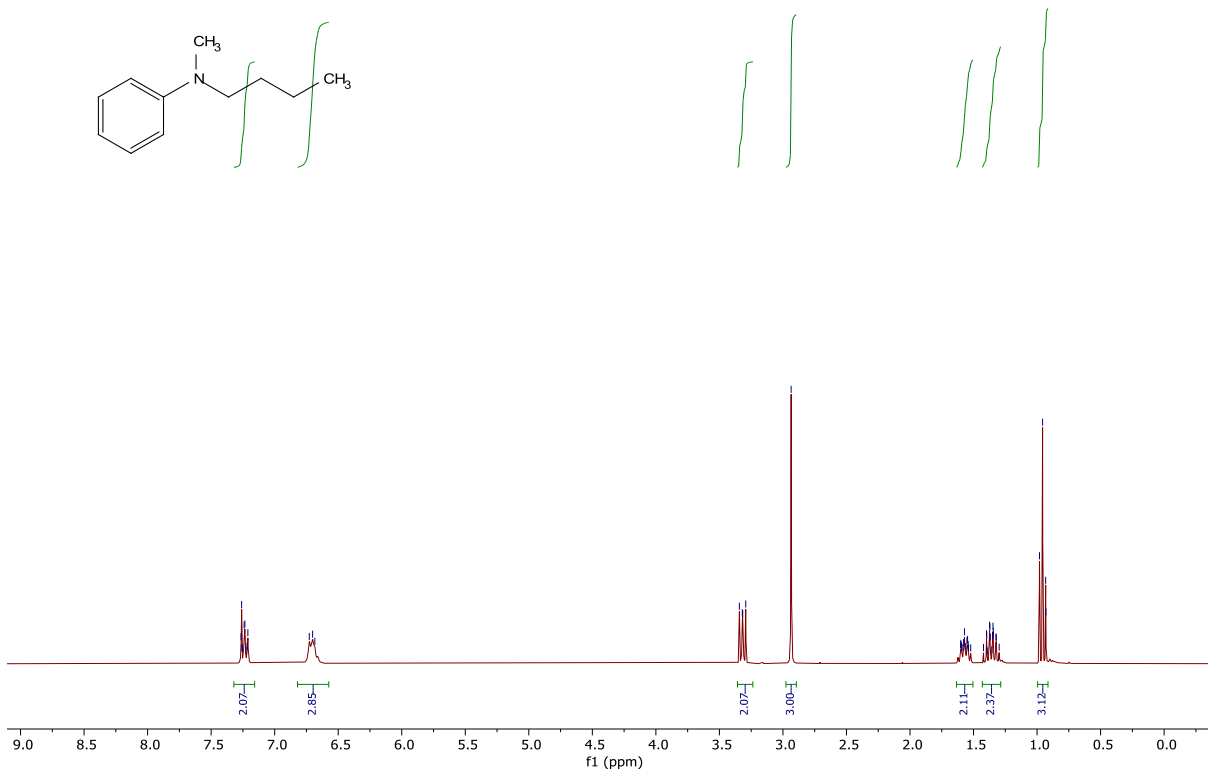

<sup>1</sup>H NMR of N-butyl-N-methylaniline (**2j**)

220206.344.10.fid  
 Changyue Ren, CY-457  
 Au1H CDCl3 {C:\Bruker\TopSpin3.6.2} 2202.44

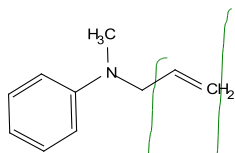

6.67  
6.67  
6.66  
6.66  
6.65  
6.65  
6.64  
6.64  
6.63  
6.63  
6.62  
6.61  
6.60  
5.83  
5.82  
5.80  
5.78  
5.78  
5.77  
5.76  
5.74  
5.72  
5.71  
5.13  
5.12  
5.11  
5.09  
5.08  
5.08  
5.07  
5.07  
5.06  
5.05  
5.05  
5.04  
3.85  
3.84  
3.84  
3.83  
3.83  
2.86

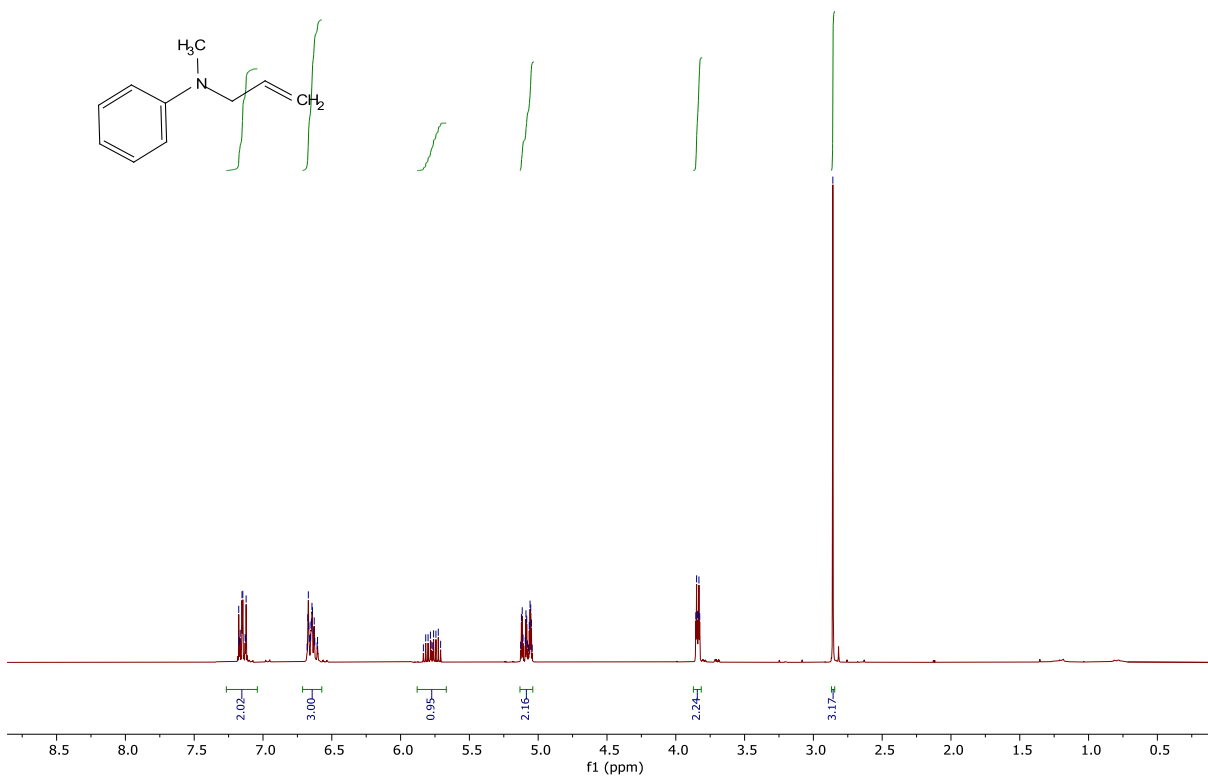

<sup>1</sup>H NMR of N-allyl-N-methylaniline (**2k**)

220427.322.10.fid  
Ren Changyue, CY-509-3  
Au1H CDCl3 {C:\Bruker\TopSpin3.6.2} 2204 22

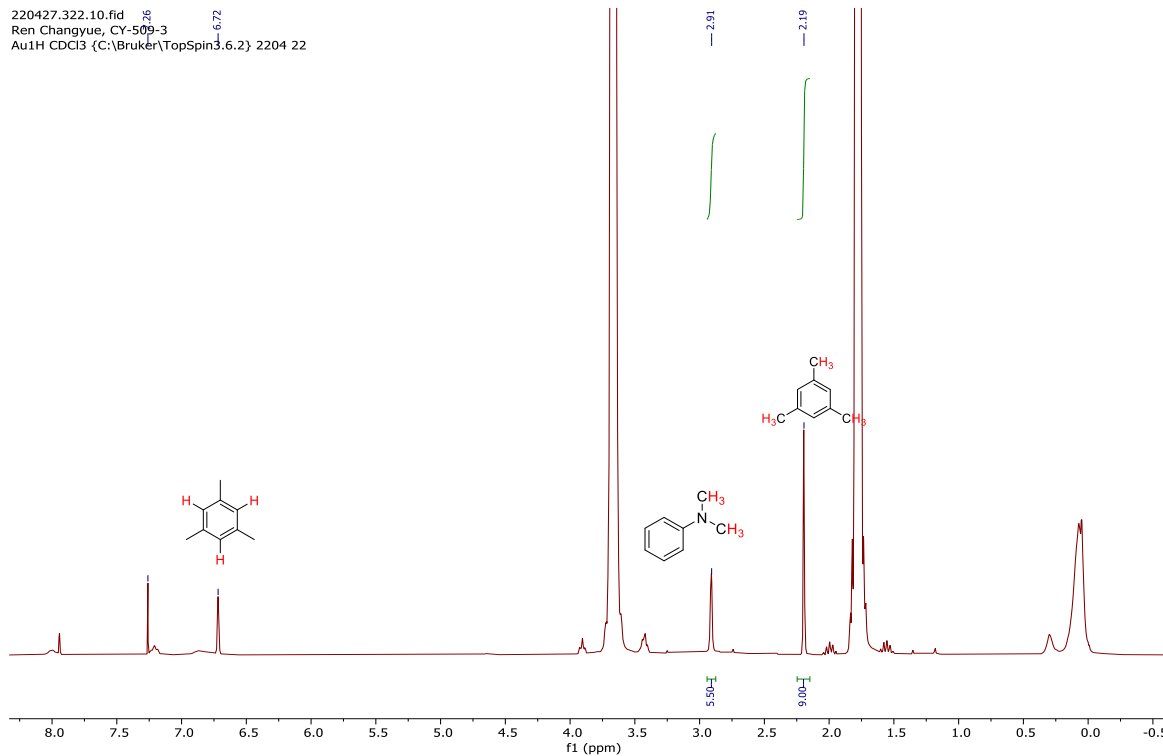

The <sup>1</sup>H NMR spectra of the reaction between *N*-methylaniline and CO<sub>2</sub> under optimal condition to give *N*-dimethylaniline. (**2a**)

220929.f342.10.fid  
Ren Changyue, CY-586-3  
PROTON CDCl3 {C:\Bruker\TopSpin3.6.2} 2209 42

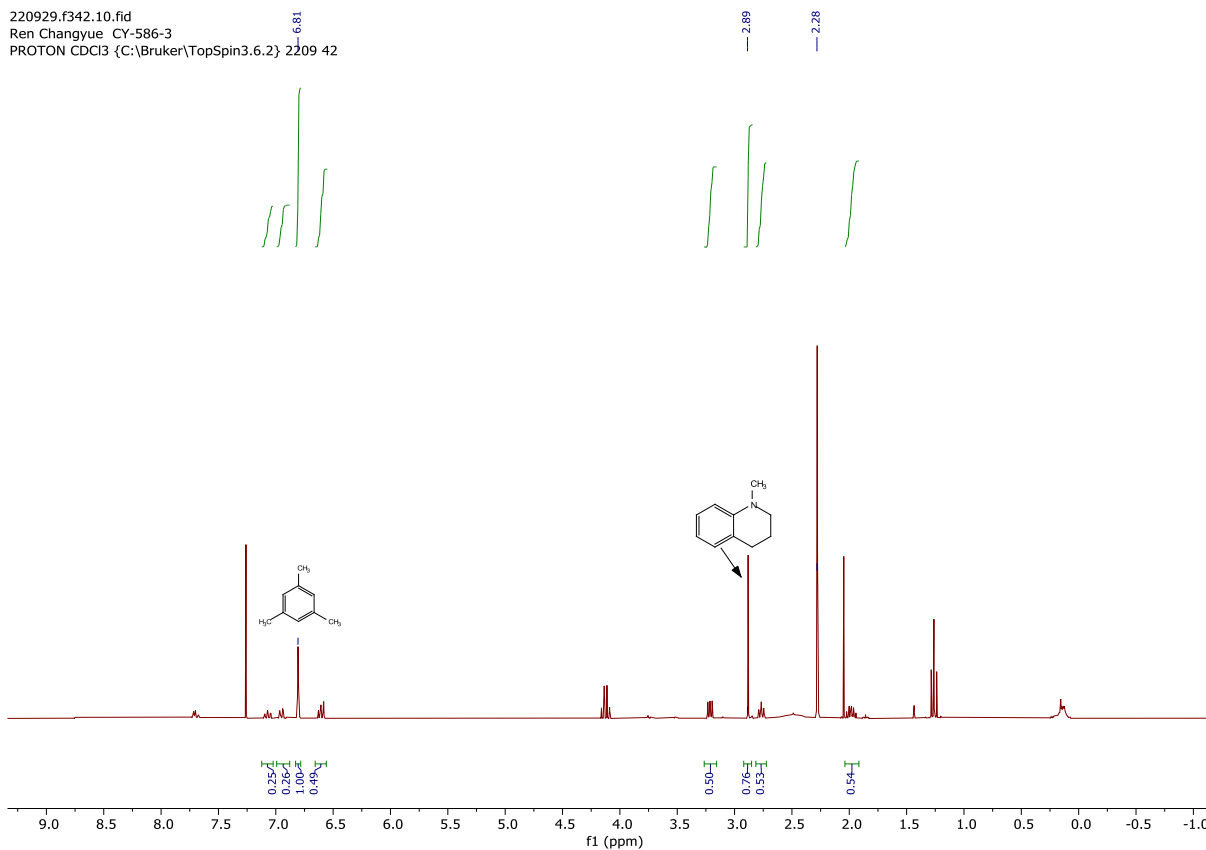

<sup>1</sup>H NMR yield of 1-methyl-1,2,3,4-tetrahydroquinoline (**2l**)

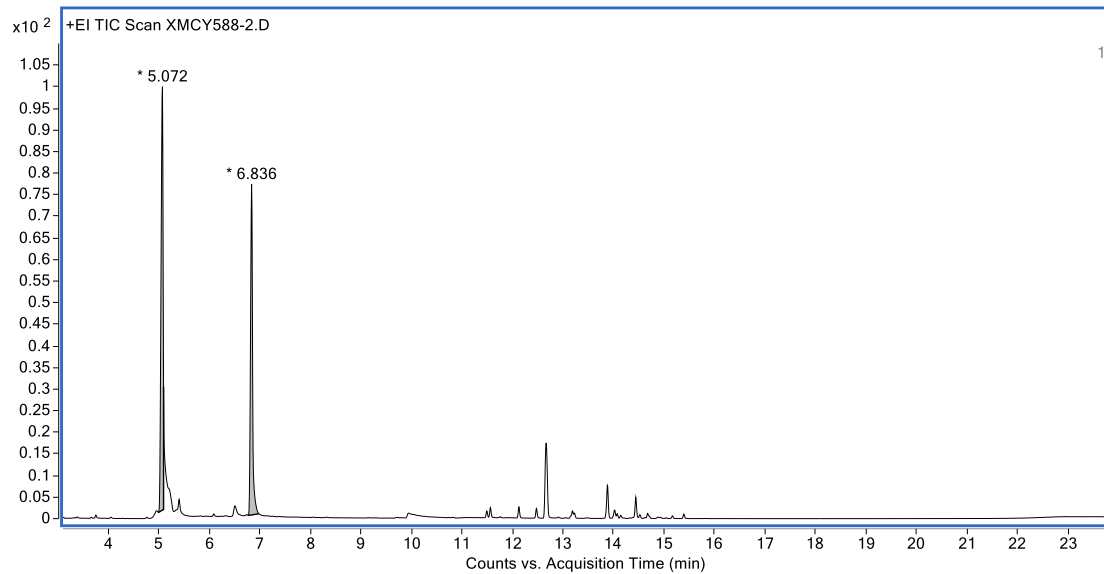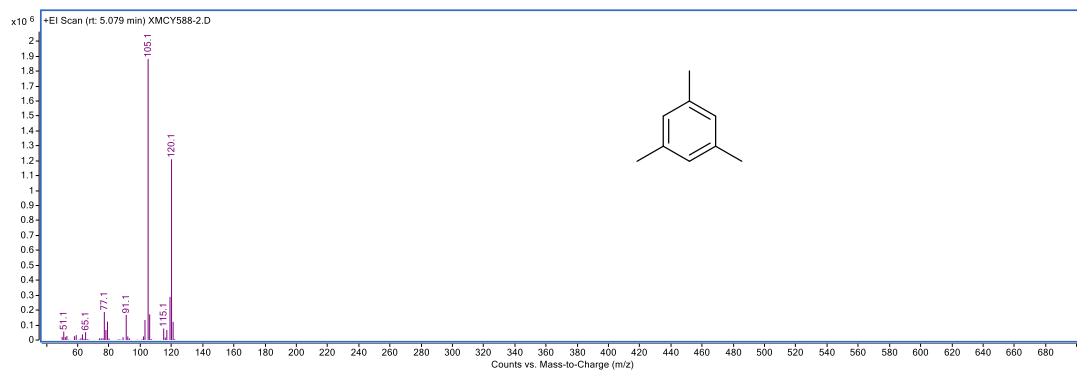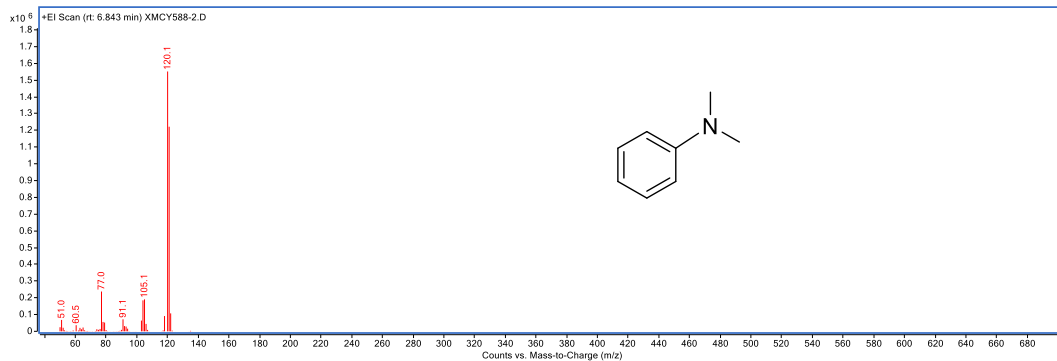

GC yield of N,N-dimethylaniline (**21**)

230117.435.10.fid  
 Ren Changyue CY-587R  
 Au1H CDCl3 {C:\Bruker\TopSpin3.6.2} 2301 35

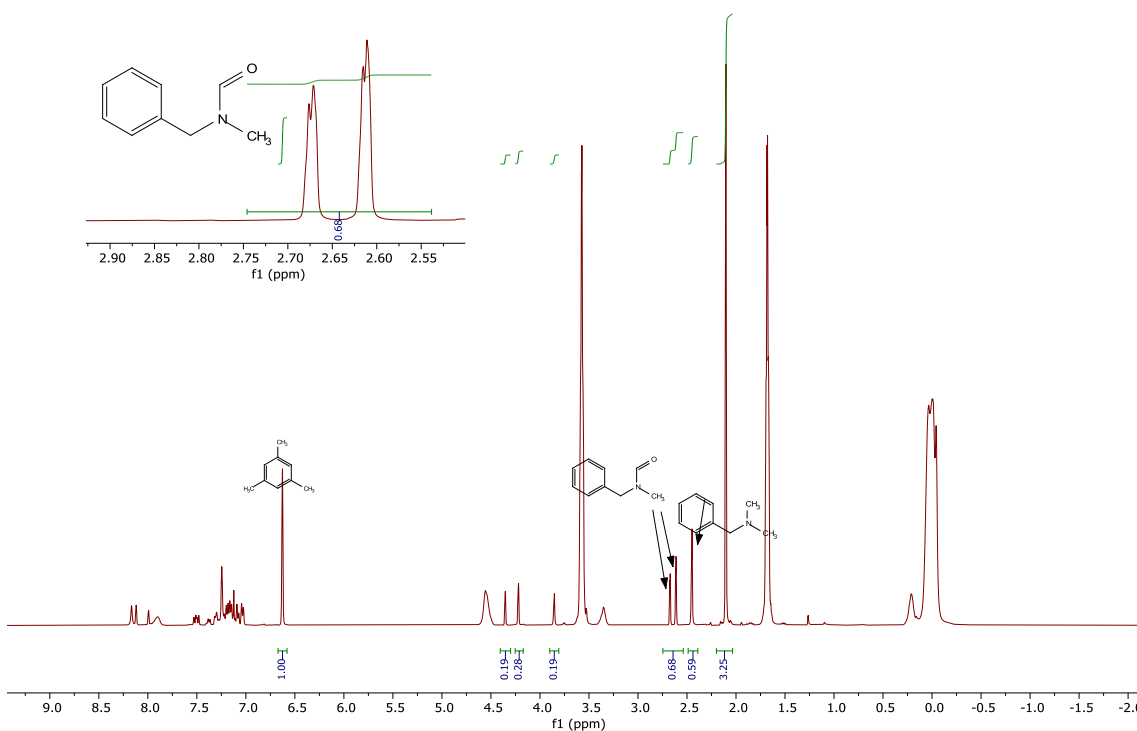

230117.434.10.fid  
 Ren Changyue CY-627  
 Au1H CDCl3 {C:\Bruker\TopSpin3.6.2} 2301 34

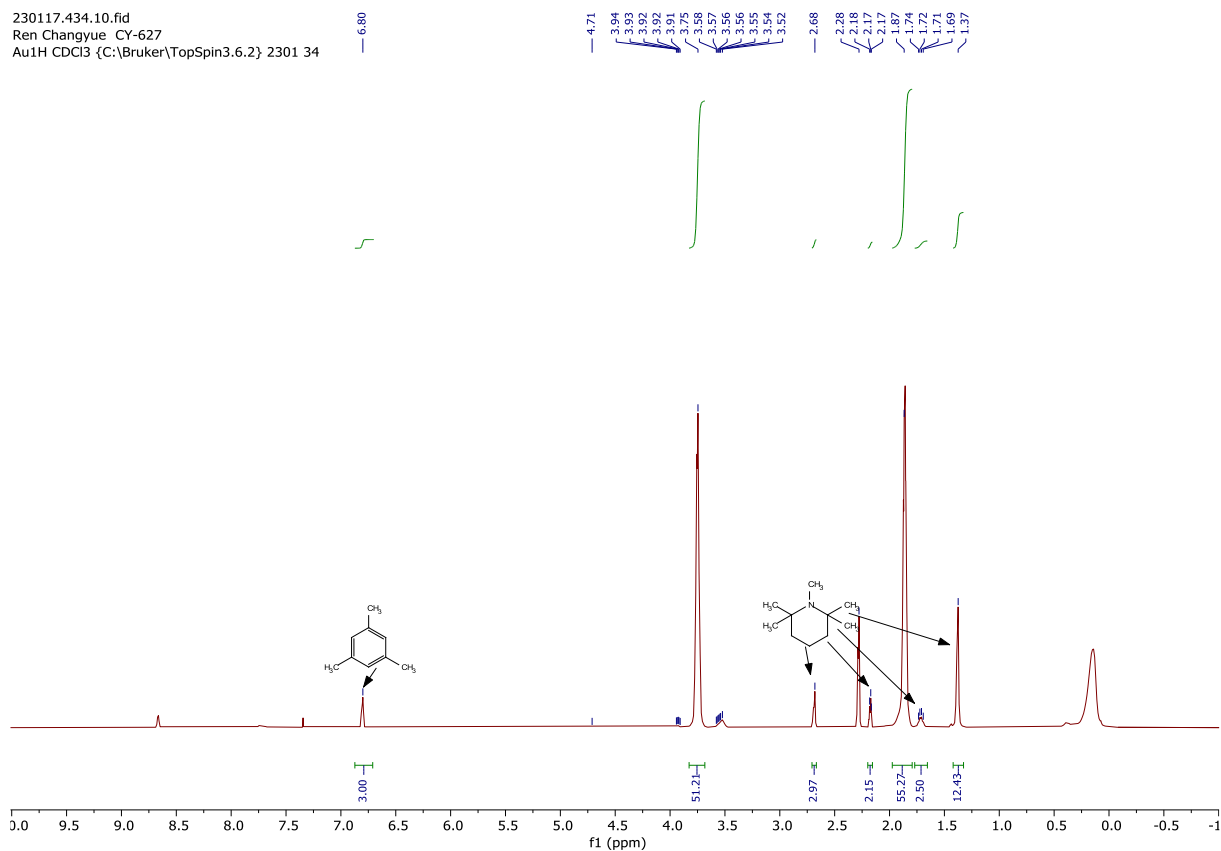

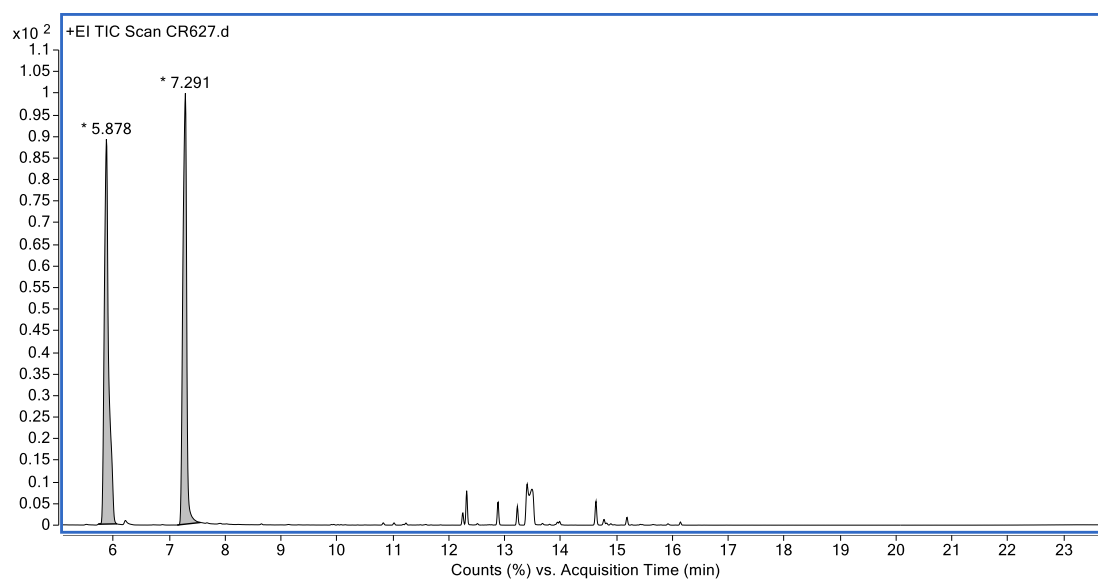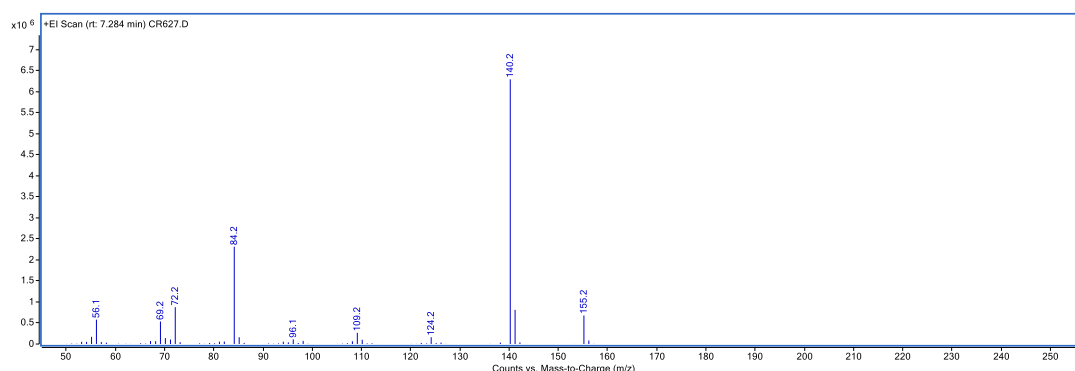

GC data of 1,2,2,6,6-pentamethylpiperidine (**2p**)

#### 4. Synthesis of formylated amines **5**

**General procedure (GP2) for the synthesis of formylated amines **3**:** A 45 cm<sup>3</sup> stainless-steel autoclave with a 5 cm<sup>3</sup> glass vial charging with catalyst (2.0 mol%) and aniline **1** (0.600 mmol), trimethoxysilane (1.80 mmol, 220 mL), 0.6 mL THF. The autoclave was purged with CO<sub>2</sub> and the pressure kept constant at 1.0 bar. The reaction mixture was stirred at 70 °C for 4-24 h. Subsequently the CO<sub>2</sub> was released slowly. Then the residue was purified by silica gel chromatography (hexane/ethyl acetate = 10/1) to afford the corresponding products **3**.

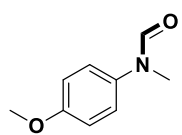 According to the GP2, 4-methoxy-N-methylaniline (**1b**, 82.3mg, 0.600 mmol), catalyst (4.23 mg, 12.0 μmol), trimethoxysilane (220 mg, 1.80 mmol) and CO<sub>2</sub> were converted at 70 °C, 1.0 bar for 4 h to yield N-(4-methoxyphenyl)-N-methylformamide **3b** (83.5 mg, 0.516 mmol, 86%) as a colorless oil. <sup>1</sup>H NMR (300 MHz, CDCl<sub>3</sub>) δ 8.34 (s, 1H), 7.10 (m, 2H), 6.92 (m, 2H), 3.82 (s, 3H), 3.27 (s, 3H).<sup>[2]</sup>

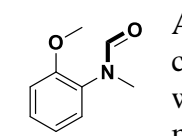 According to the GP2, 2-methoxy-N-methylaniline (**1c**, 82.3mg, 0.600 mmol), catalyst (4.23 mg, 12.0 μmol), trimethoxysilane (220 mg, 1.80 mmol) and CO<sub>2</sub> were converted at 70 °C, 1.0 bar for 24 h to yield N-(2-methoxyphenyl)-N-methylformamide **3c** (78.2 mg, 0.473 mmol, 79%) as a colorless oil. <sup>1</sup>H NMR (300 MHz, CDCl<sub>3</sub>) δ 8.17 (s, 1H), 7.36 – 7.28 (m, 1H), 7.12 (dd, 1H), 7.02 – 6.91 (m, 2H), 3.84 (s, 3H), 3.20 (s, 3H).<sup>[2]</sup>

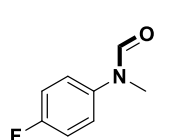 According to the GP2, 4-fluoro-N-methylaniline (**1d**, 75.1 mg, 0.600 mmol), catalyst (4.23 mg, 12.0 μmol), trimethoxysilane (220 mg, 1.80 mmol) and CO<sub>2</sub> were converted at 70 °C, 1.0 bar for 4 h to yield N-(4-fluorophenyl)-N-



methylformamide **3d** (79.0 mg, 0.511 mmol, 86%) as a colorless oil. <sup>1</sup>H NMR (300 MHz, CDCl<sub>3</sub>) δ 8.38 (s, 1H), 7.21 – 7.03 (m, 4H), 3.29 (s, 3H).<sup>[2]</sup>

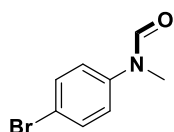

According to the GP2, 4-bromo-*N*-methylaniline (**1e**, 112 mg, 0.600 mmol), catalyst (4.23 mg, 12.0 μmol), trimethoxysilane (220 mg, 1.80 mmol) and CO<sub>2</sub> were converted at 70 °C, 1.0 bar for 4 h to yield *N*-(4-bromophenyl)-*N*-methylformamide **3e** (96.6 mg, 0.456 mmol, 76%) as a yellow solid. <sup>1</sup>H NMR (300 MHz, CDCl<sub>3</sub>) δ 8.45 (s, 1H), 7.53 (m, 2H), 7.05 (dt, *J* = 8.8 Hz, 2H), 3.30 (s, 3H).<sup>[4]</sup>

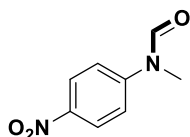

According to the GP2, 4-nitro-*N*-methylaniline (**1f**, 91.3 mg, 0.600 mmol), catalyst (4.23 mg, 12.0 μmol), trimethoxysilane (220 mg, 1.80 mmol) and CO<sub>2</sub> were converted at 70 °C, 1.0 bar for 24 h to yield *N*-methyl-*N*-(4-nitrophenyl)formamide **3f** (14.3 mg, 0.078 mmol, 13%) as a yellow solid. <sup>1</sup>H NMR (300 MHz, CDCl<sub>3</sub>) δ 8.72 (s, 1H), 8.40 – 8.24 (m, 2H), 7.32 (d, *J* = 9.1 Hz, 2H), 3.39 (d, *J* = 0.4 Hz, 3H).<sup>[4]</sup>

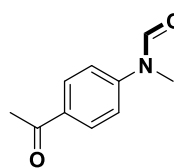

According to the GP2, 4-acetyl-*N*-methylaniline (**1g**, 89.5 mg, 0.600 mmol), catalyst (4.23 mg, 12.0 μmol), trimethoxysilane (220 mg, 1.80 mmol) and CO<sub>2</sub> were converted at 70 °C, 1.0 bar for 24 h to yield *N*-(4-acetylphenyl)-*N*-methylformamide **3g** (56.0 mg, 0.297 mmol, 53%) as a light yellow solid. <sup>1</sup>H NMR (300 MHz, CDCl<sub>3</sub>) δ 8.65 (s, 1H), 8.11 – 7.97 (m, 2H), 7.37 – 7.07 (m, 2H), 3.36 (s, 3H), 2.61 (s, 3H).<sup>[4]</sup>

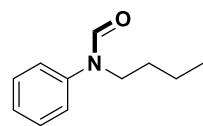

According to the GP2, *N*-butylaniline (**1j**, 89.5 mg, 0.600 mmol), catalyst (4.23 mg, 12.0 μmol), trimethoxysilane (220 mg, 1.80 mmol) and CO<sub>2</sub> were converted at 70 °C, 1.0 bar for 24 h to yield *N*-butyl-*N*-phenylformamide **3j** (88.4 mg, 0.504 mmol, 84%) as a colourless oil. <sup>1</sup>H NMR (300 MHz, CDCl<sub>3</sub>) δ 8.37 (s, 1H), 7.46 – 7.37 (m, 2H), 7.33 – 7.26 (m, 1H), 7.20 – 7.14 (m, 2H), 3.87 – 3.74 (m, 2H), 1.61 – 1.44 (m, 2H), 1.41 – 1.22 (m, 2H), 0.89 (t, *J* = 7.3 Hz, 3H).<sup>[2]</sup>

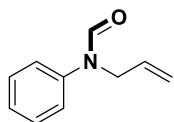

According to the GP2, *N*-allylaniline (**1k**, 79.9 mg, 0.600 mmol), catalyst (4.23 mg, 12.0 μmol), trimethoxysilane (220 mg, 1.80 mmol) and CO<sub>2</sub> were converted at 70 °C, 1.0 bar for 24 h to yield *N*-allyl-*N*-phenylformamide **3k** (81.7 mg, 0.510 mmol, 85%) as a colourless oil. <sup>1</sup>H NMR (300 MHz, CDCl<sub>3</sub>) δ 8.51 (s, 1H), 7.48 – 7.35 (m, 2H), 7.35 – 7.25 (m, 1H), 7.25 – 7.16 (m, 2H), 5.95 – 5.79 (m, 1H), 5.27 – 5.14 (m, 2H), 4.44 (dt, *J* = 5.6, 1.6 Hz, 2H).<sup>[2]</sup>

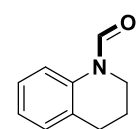

According to the GP2, 1,2,3,4-tetrahydroquinoline (**1l**, 79.9 mg, 0.600 mmol), catalyst (4.23 mg, 12.0 μmol), trimethoxysilane (220 mg, 1.80 mmol) and CO<sub>2</sub> were converted at 70 °C, 1.0 bar for 24 h to yield 3,4-dihydroquinoline-1(2H)-carbaldehyde **3l** (90.8 mg, 0.564 mmol, 94 %) as a colourless solid. <sup>1</sup>H NMR (300 MHz, CDCl<sub>3</sub>) δ 8.79 (s, 1H), 7.24 – 7.04 (m, 4H), 3.90 – 3.75 (m, 2H), 2.81 (t, *J* = 6.5 Hz, 2H), 2.05 – 1.88 (m, 2H).<sup>[3]</sup>

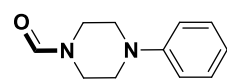

According to the GP2, 1-phenylpiperazine (**1r**, 97.3 mg, 0.600 mmol), catalyst (4.23 mg, 12.0 μmol), trimethoxysilane (220 mg, 1.80 mmol) and CO<sub>2</sub> were converted at 70 °C, 1.0 bar for 24 h to yield 4-phenylpiperazine-1-carbaldehyde **3r** (101 mg, 0.534 mmol, 89 %) as a colorless solid. <sup>1</sup>H NMR (300 MHz, CDCl<sub>3</sub>) δ 8.13 (s, 1H), 7.38 – 7.23 (m, 2H), 7.04 – 6.89 (m, 3H), 3.74 (t, *J* = 5.0, 2H), 3.56 (t, *J* = 5.0, 2H), 3.33 – 3.11 (m, 4H).<sup>[5]</sup>

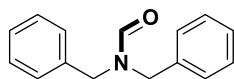

According to the GP2, dibenzylamine (**1q**, 118.4 mg, 0.600 mmol), catalyst (4.23 mg, 12.0 μmol), trimethoxysilane (220 mg, 1.80 mmol) and CO<sub>2</sub> were converted at 70 °C, 1.0 bar for 24 h to yield *N,N*-dibenzylformamide **3q** (101.4 mg, 0.450 mmol, 75%) as a colourless solid. <sup>1</sup>H NMR (300 MHz, CDCl<sub>3</sub>) δ 8.43 (s, 1H), 7.48 – 7.27 (m, 6H), 7.26 – 7.11 (m, 4H), 4.42 (s, 2H), 4.27 (s, 2H).<sup>[3]</sup>

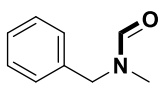
 According to the GP2, *N*-methyl-1-phenylmethanamine (**1o**, 72.7 mg, 0.600 mmol), catalyst (4.23 mg, 12.0  $\mu$ mol), trimethoxysilane (220 mg, 1.80 mmol) and CO<sub>2</sub> were converted at 70 °C, 1.0 bar for 24 h to yield *N*-benzylformamide **3o** (82.0 mg, 0.552 mmol, 92%) as a colourless oil. <sup>1</sup>H NMR (300 MHz, CDCl<sub>3</sub>)  $\delta$  8.21 (s, 0.57H, maj), 8.08 (s, 0.43H, min), 7.38 – 7.04 (m, 5H), 4.44 (s, 0.89H, min), 4.31 (s, 1.19H, maj), 2.77 (s, 1.33H, min), 2.70 (s, 1.71H, maj).<sup>[4]</sup>

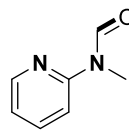
 According to the GP2, *N*-methylpyridin-2-amine (**1s**, 64.9 mg, 0.600 mmol), catalyst (4.23 mg, 12.0  $\mu$ mol), trimethoxysilane (220 mg, 1.80 mmol) and CO<sub>2</sub> were converted at 70 °C, 1.0 bar for 24 h to yield *N*-methyl-*N*-(pyridin-2-yl)formamide **3s** (56.3 mg, 0.414 mmol, 69%) as a colorless oil. <sup>1</sup>H NMR (300 MHz, CDCl<sub>3</sub>)  $\delta$  9.34 (s, 1H), 8.38 (ddd, *J* = 4.9, 2.0, 0.9 Hz, 1H), 7.72 (ddd, *J* = 8.3, 7.4, 2.0 Hz, 1H), 7.16 – 6.92 (m, 2H), 3.34 (d, *J* = 0.4 Hz, 3H).<sup>[4]</sup>

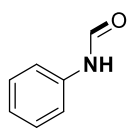
 According to the GP2, aniline (**1t**, 55.9 mg, 0.600 mmol), catalyst (4.23 mg, 12.0  $\mu$ mol), trimethoxysilane (220 mg, 1.80 mmol) and CO<sub>2</sub> were converted at 70 °C, 1.0 bar for 24 h to yield *N*-phenylformamide **3t** (65.3 mg, 0.540 mmol, 90%) as a colorless solid. <sup>1</sup>H NMR (400 MHz, CDCl<sub>3</sub>)  $\delta$  8.84 – 8.18 (m, 1H), 7.64 – 7.45 (m, 1H), 7.43 – 7.29 (m, 2H), 7.24 – 7.00 (m, 2H).<sup>[2]</sup>

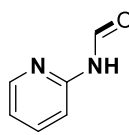
 According to the GP2, pyridin-2-amine (**1u**, 56.5 mg, 0.600 mmol), catalyst (4.23 mg, 12.0  $\mu$ mol), trimethoxysilane (220 mg, 1.80 mmol) and CO<sub>2</sub> were converted at 70 °C, 1.0 bar for 24 h to yield *N*-(pyridin-2-yl)formamide **3u** (41.3 mg, 0.336 mmol, 56%) as a colorless oil. <sup>1</sup>H NMR (300 MHz, CDCl<sub>3</sub>)  $\delta$  9.52 (minor rotamer, br s, 0.40 H), 9.31 (m, 1H), 8.51 (major rotamer, s, 0.53 H), 8.32 (d, *J* = 0.9 Hz, 1H), 8.24 (d, *J* = 1.0 Hz, 0.54H), 7.74 (t, *J* = 1.9 Hz, 0.56H), 7.67 (t, *J* = 1.9 Hz, 0.41H), 7.08 (m, 1H), 6.90 (dt, *J* = 8.3, 1.0 Hz, 0.43H).<sup>[4]</sup>

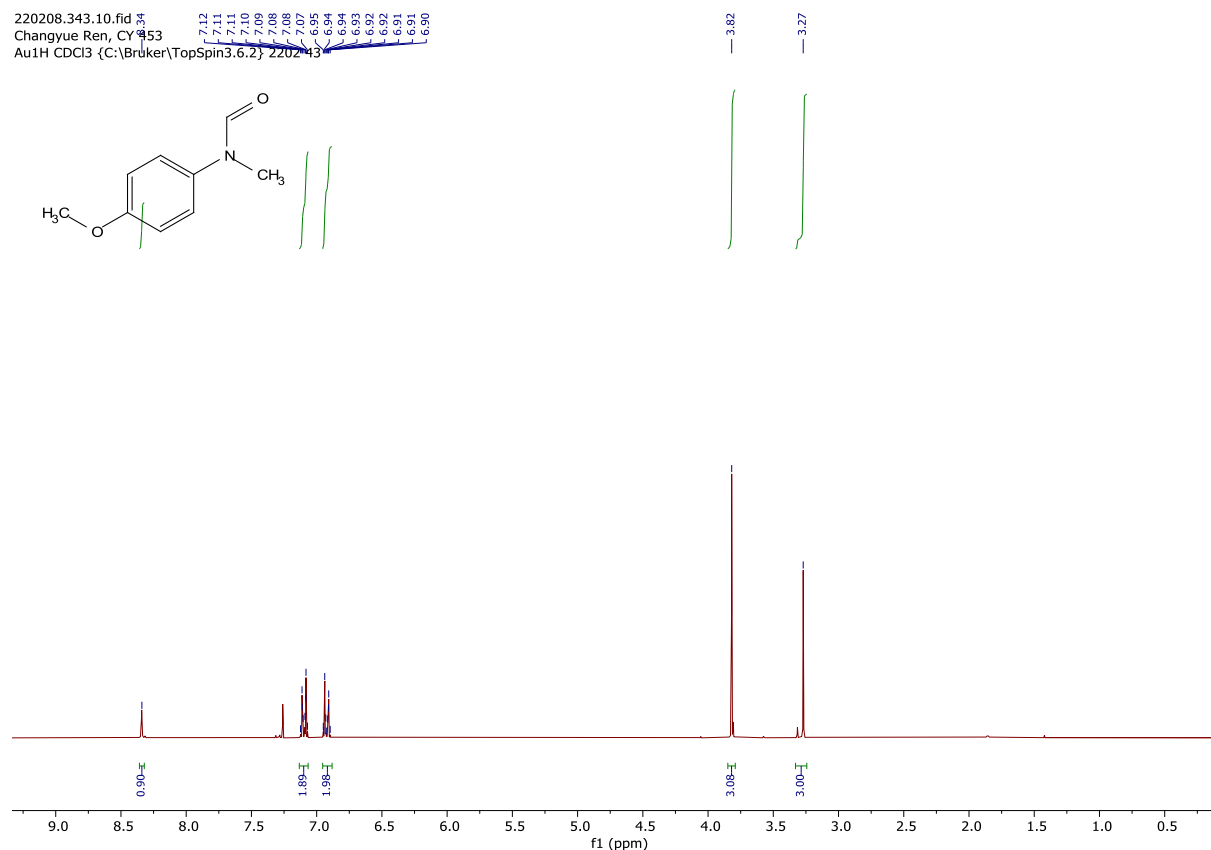

<sup>1</sup>H NMR of *N*-(4-methoxyphenyl)-*N*-methylformamide (**3b**)

220210.f358.10.fid  
Ren/ CY-456  
PROTON CDCl3 {C:\Bruker\TopSpin3.6.2} 2202 58

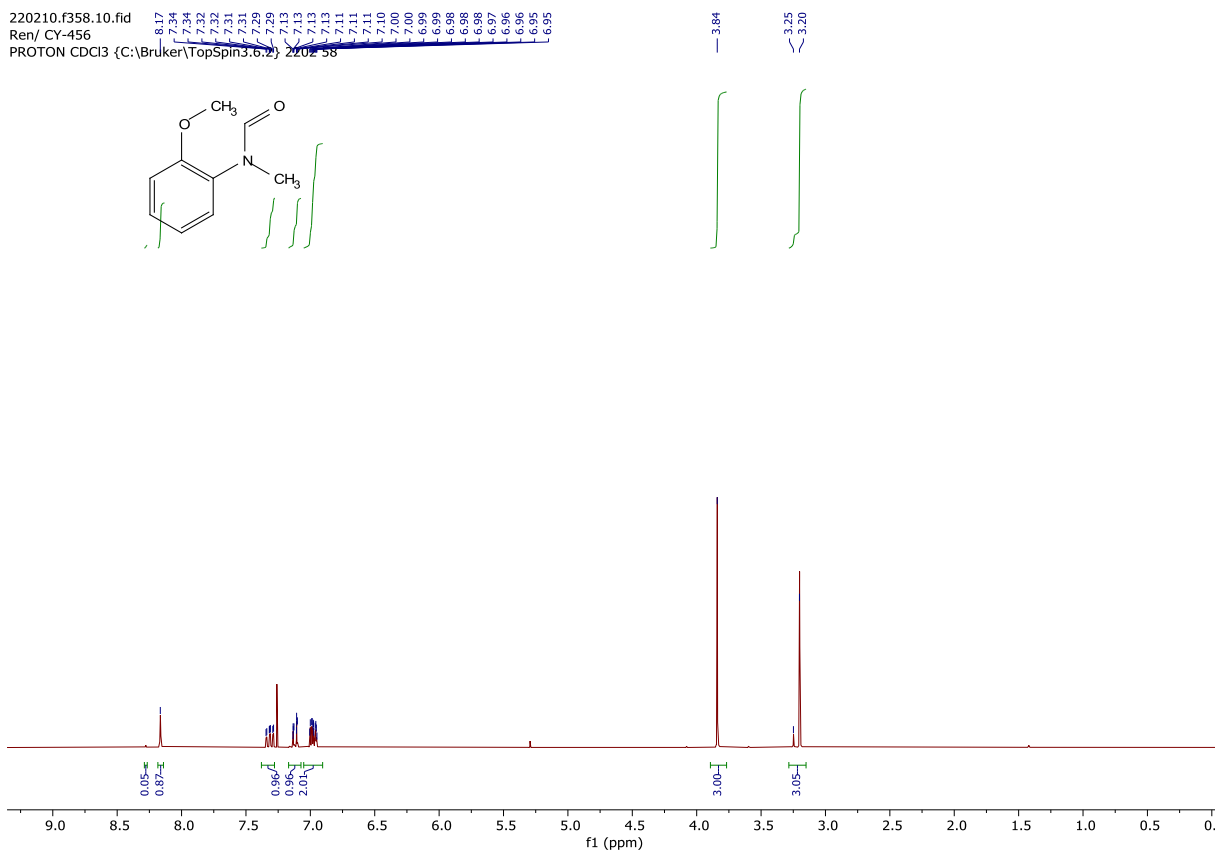

<sup>1</sup>H NMR of N-(2-methoxyphenyl)-N-methylformamide (3c)

220208.344.10.fid  
Changyue Ren, CY 454  
Au1H CDCl3 {C:\Bruker\TopSpin3.6.2} 2202 44

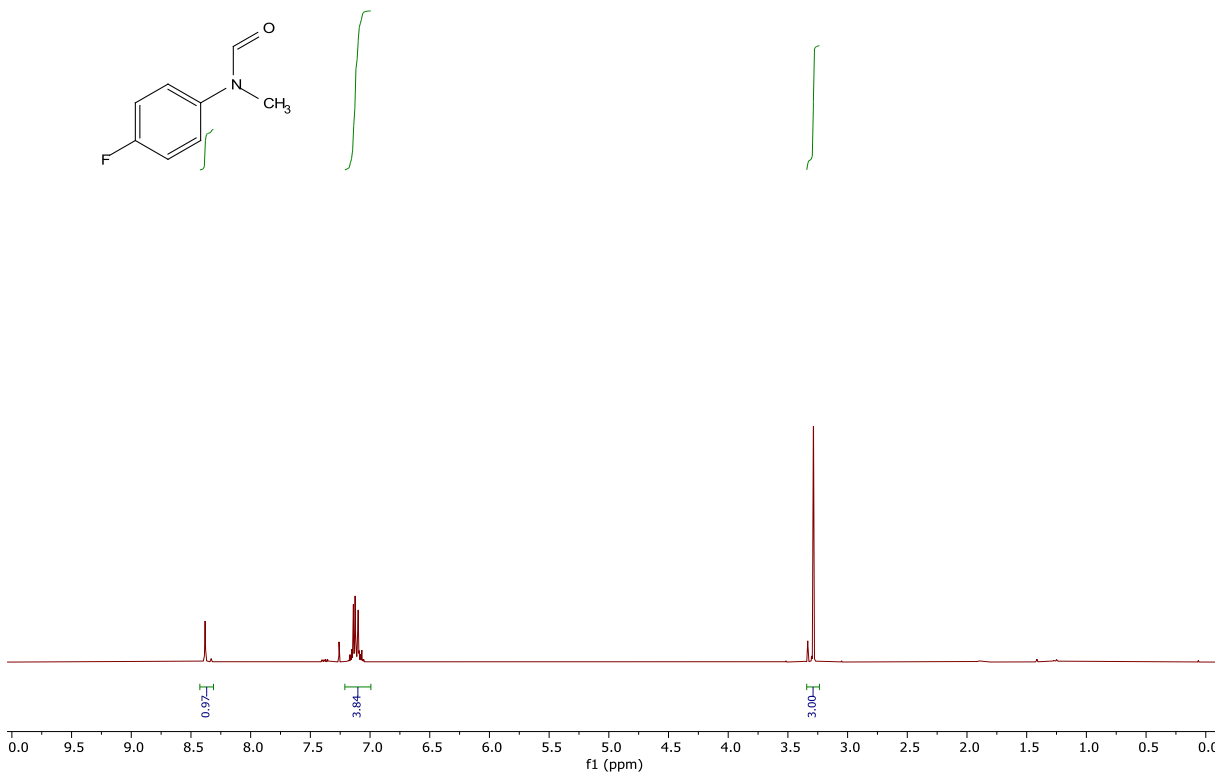

<sup>1</sup>H NMR of N-(4-fluorophenyl)-N-methylformamide (3d)

220617.309.10.fid  
Ren Changyue, CY-537  
Au1H CDCl3 {C:\Bruker\TopSpin3.6.2} 2206 9

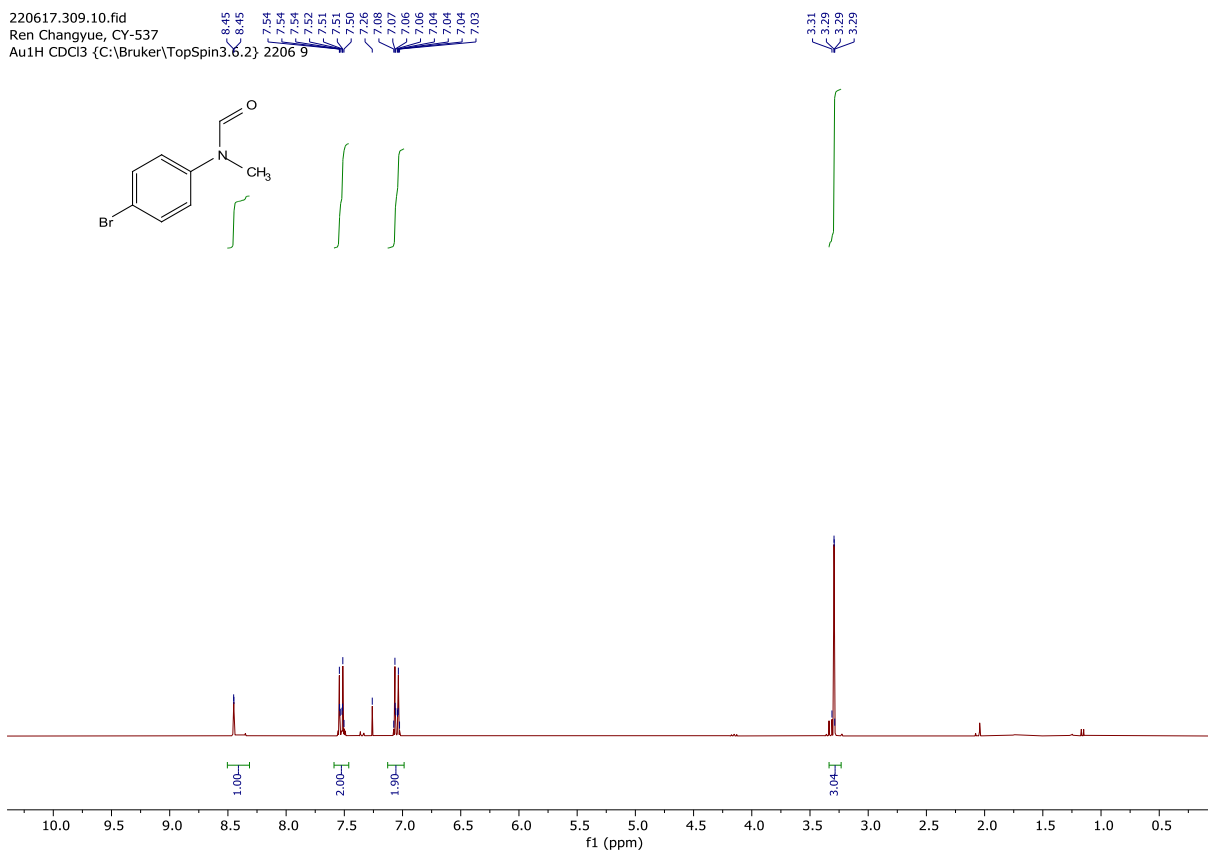

<sup>1</sup>H NMR of N-(4-bromophenyl)-N-methylformamide (**3e**)

220713.331.10.fid  
Changyue Ren, CY-549  
Au1H CDCl3 {C:\Bruker\TopSpin3.6.2} 2207 31

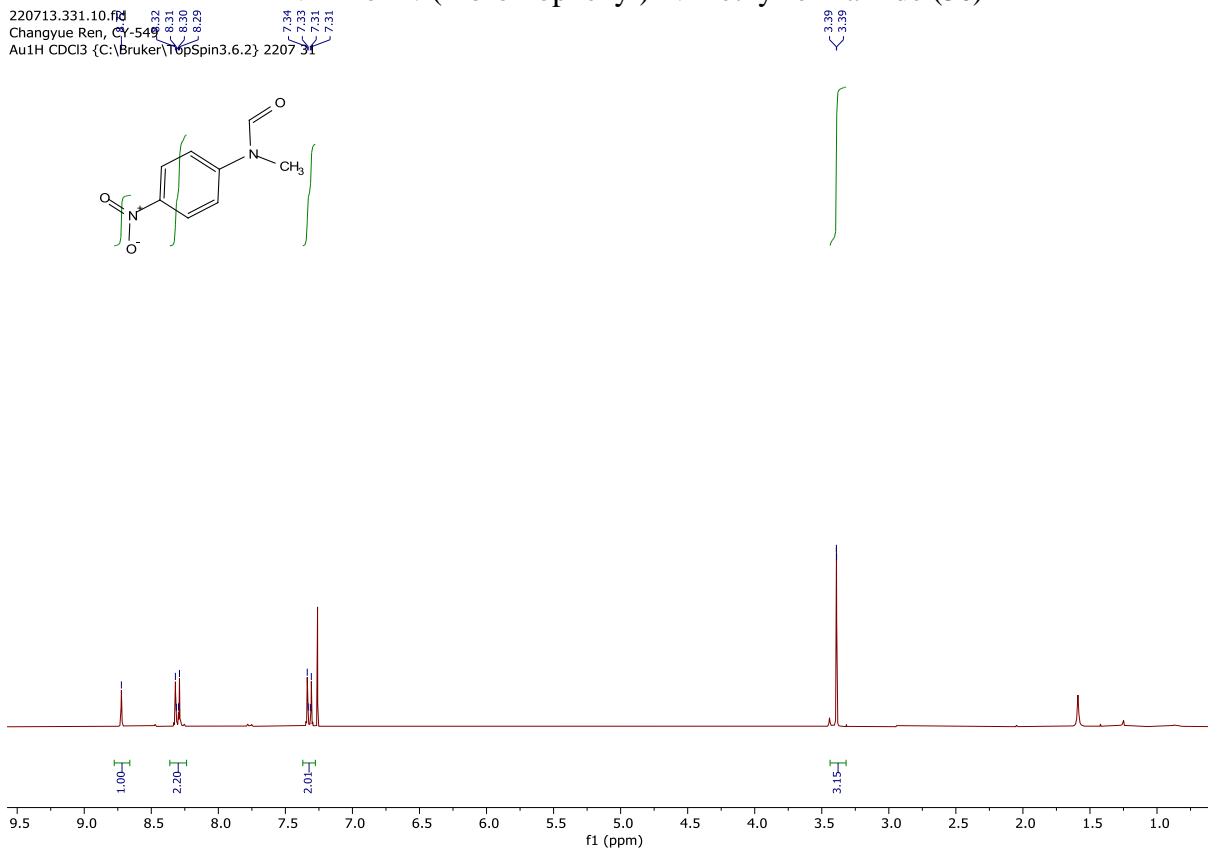

<sup>1</sup>H NMR of N-methyl-N-(4-nitrophenyl)formamide (**3f**)

220309.f348.10.fid  
 Ren Changyue CY 476  
 PROTON CDCl3 {C:\Bruker\TopSpin3.6.2} 2203 48

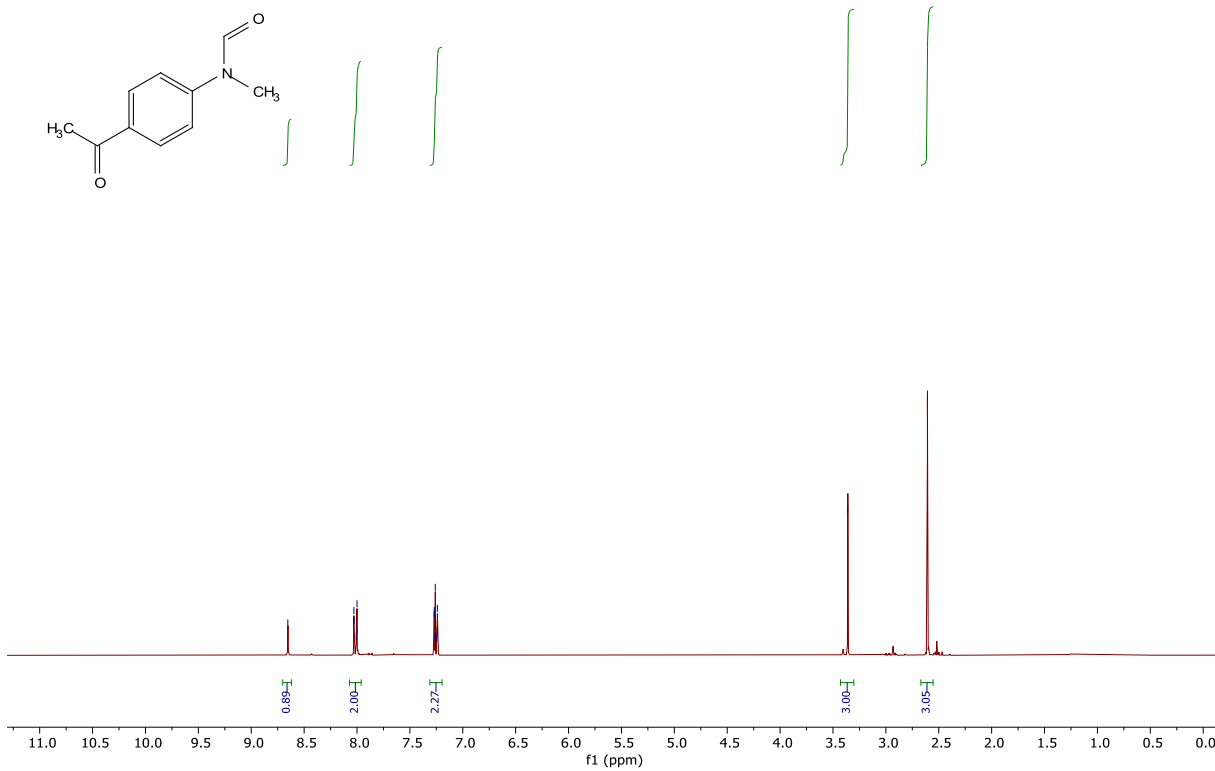

220211.341.10.fid  
 Changyue Ren, CY-457  
 Au1H CDCl3 {C:\Bruker\TopSpin3.6.2} 2202 41

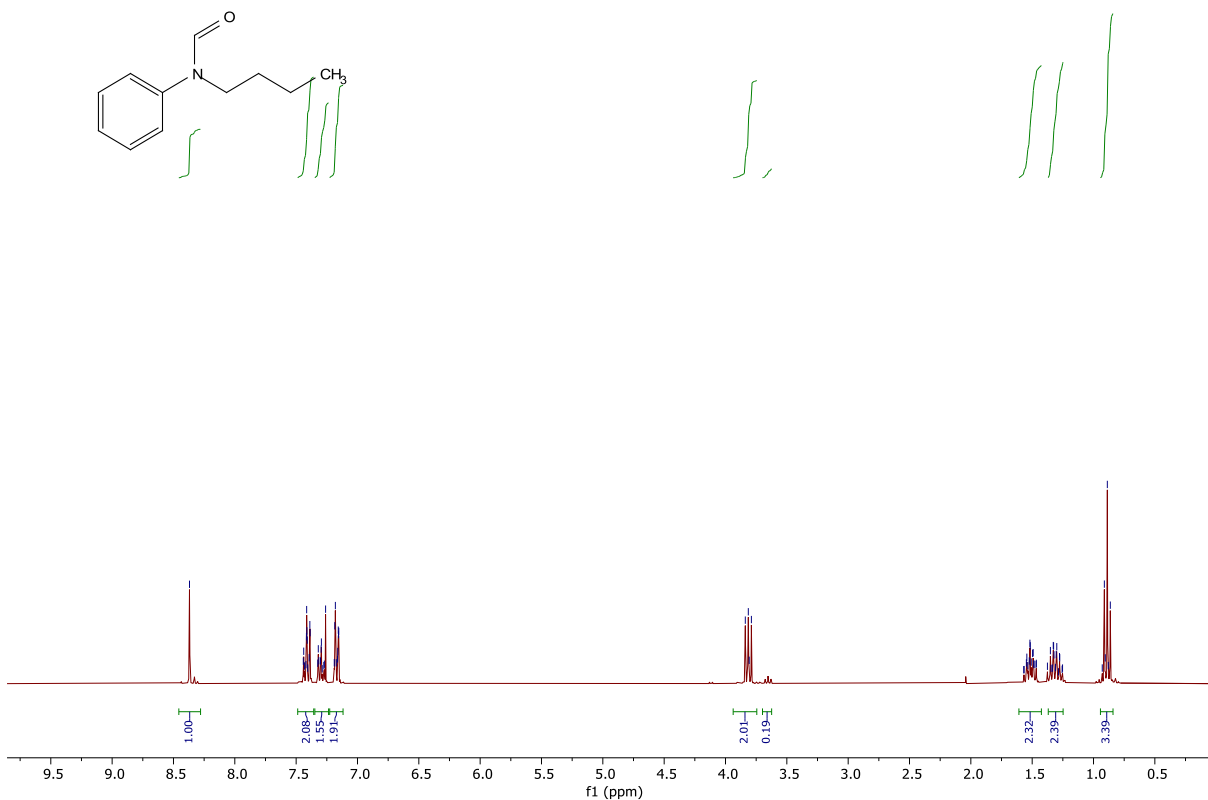

220216432.10.fid  
 Ren Changyue CY-464  
 PROTON CDCl3 {C:\Bruker\TopSpin3.6.2} 2202-42

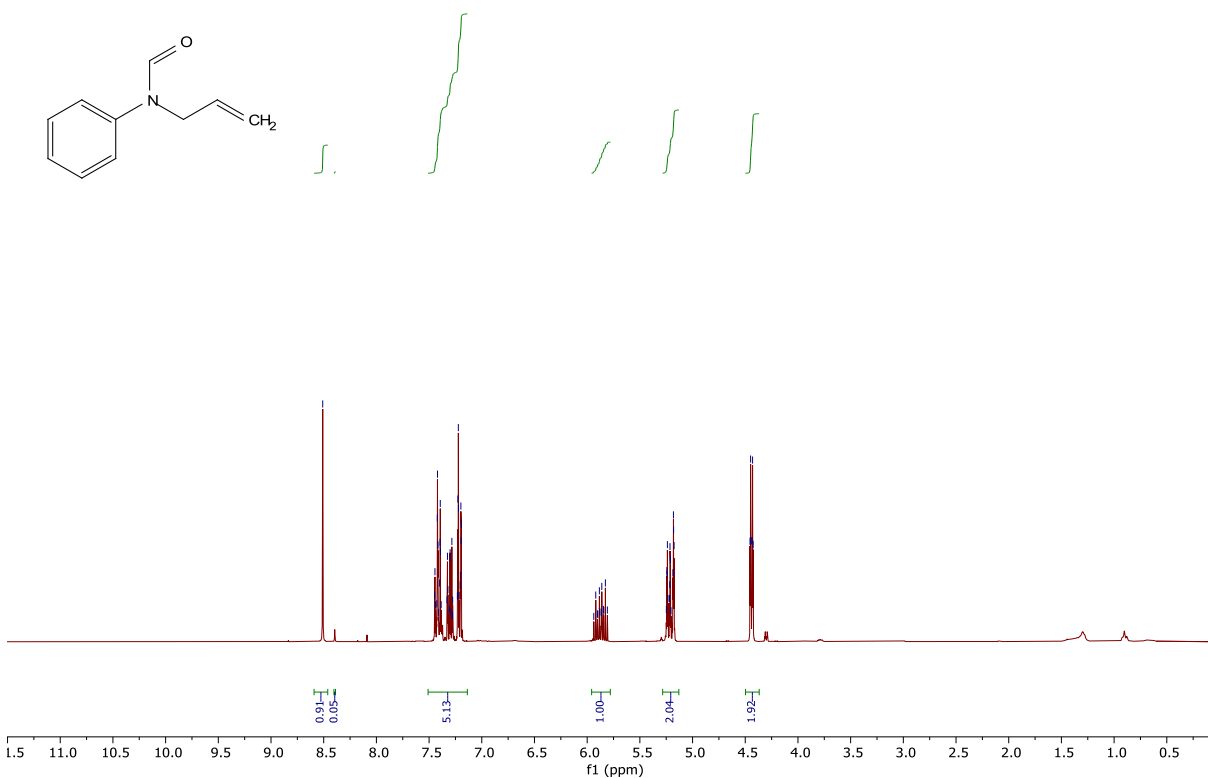

220303.320.10.fid  
 Ren Changyue CY-463  
 Au1H CDCl3 {C:\Bruker\TopSpin3.6.2} 2203-20

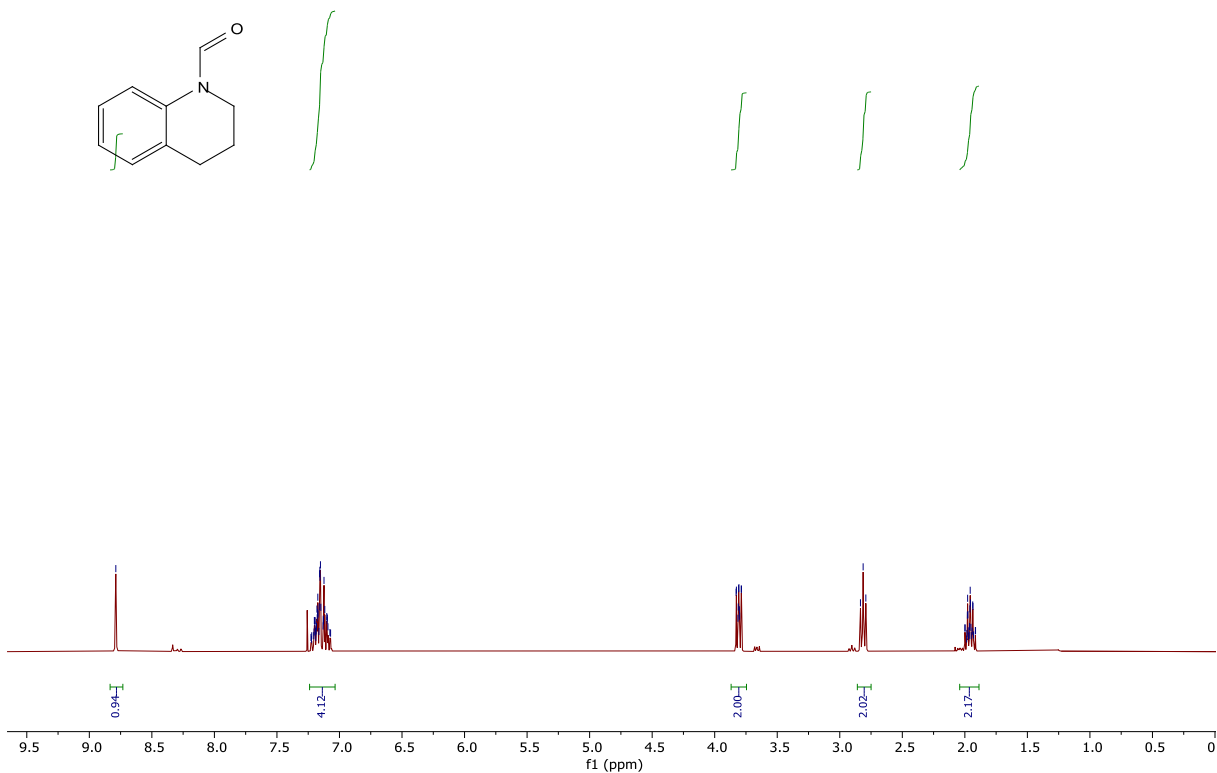

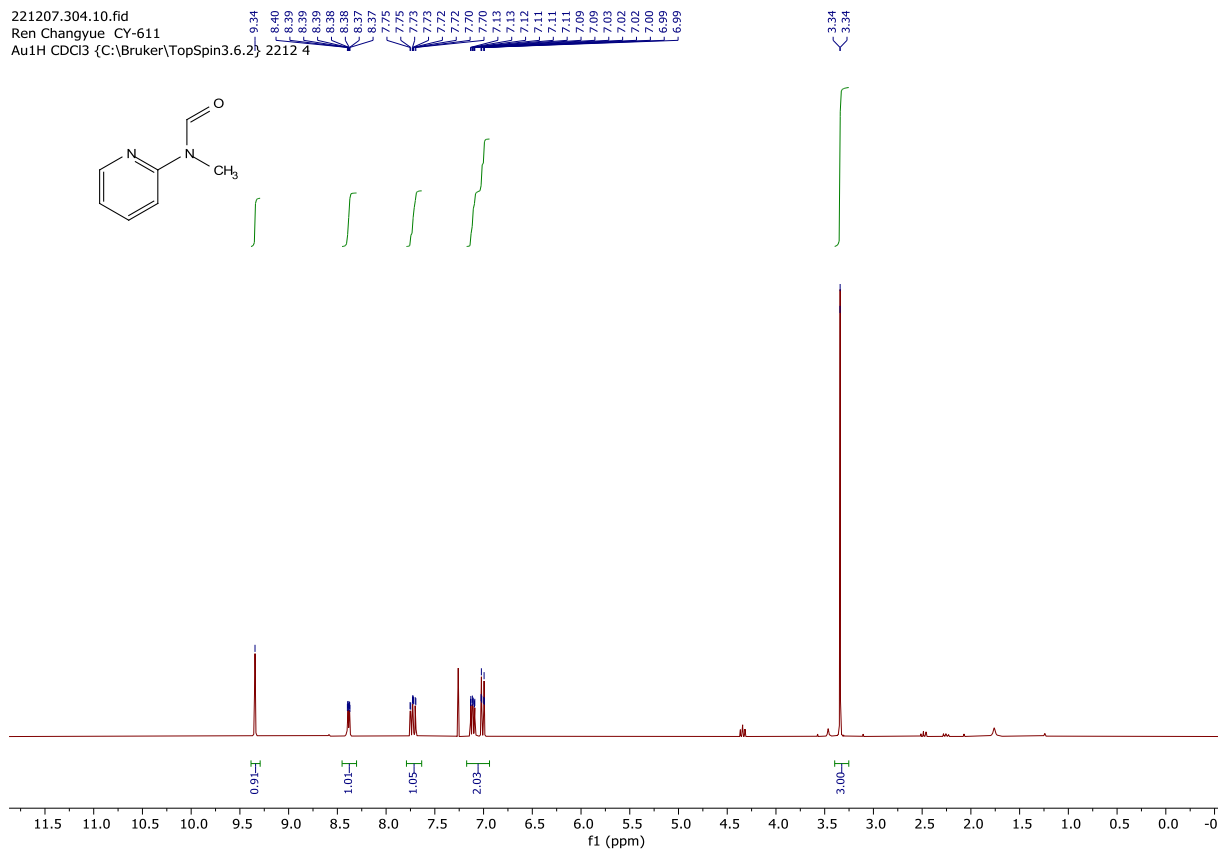

$^1\text{H}$  NMR of N-methyl-N-(pyridin-2-yl)formamide (**3s**)

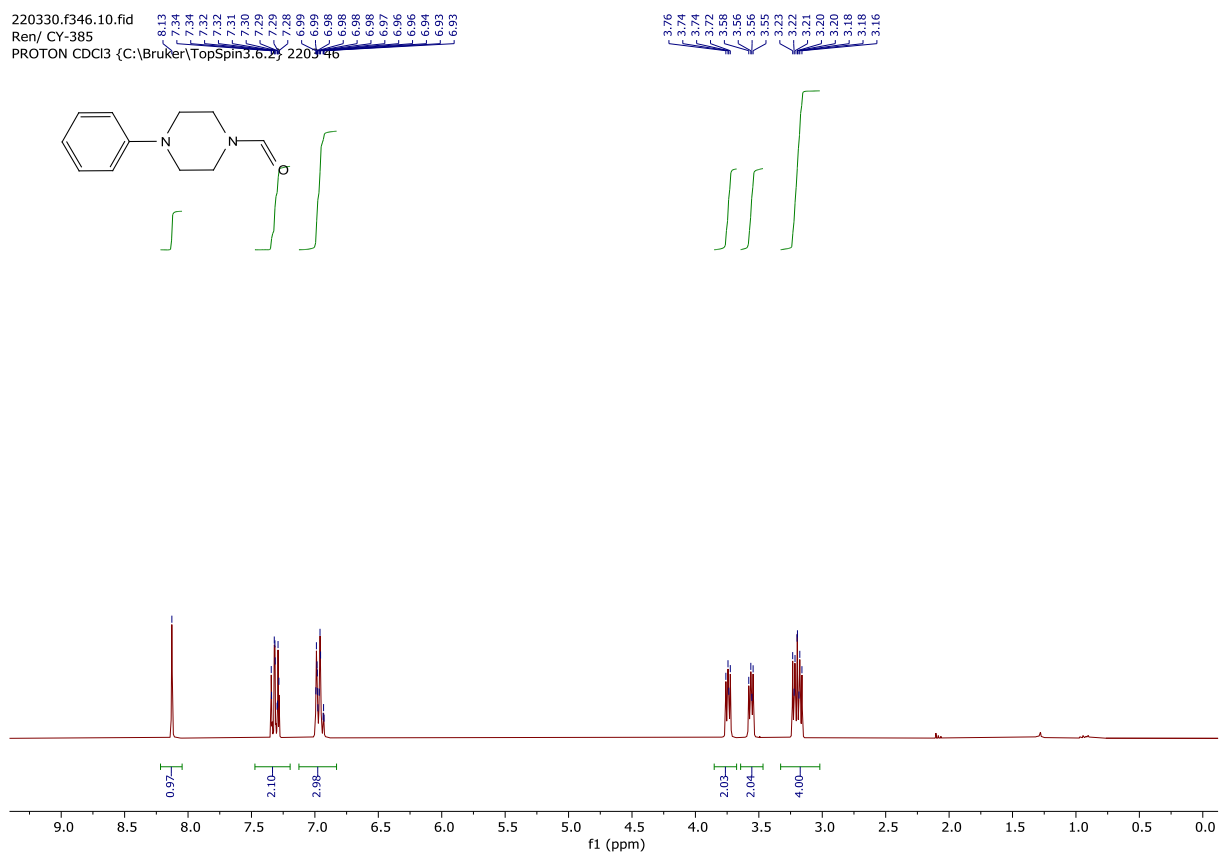

$^1\text{H}$  NMR of 4-phenylpiperazine-1-carbaldehyde (**3r**)

221208.345.10.fid  
Ren Changyue CY-612  
Au1H CDCl3 {C:\Bruker\TopSpin3.6.2} 2212 45

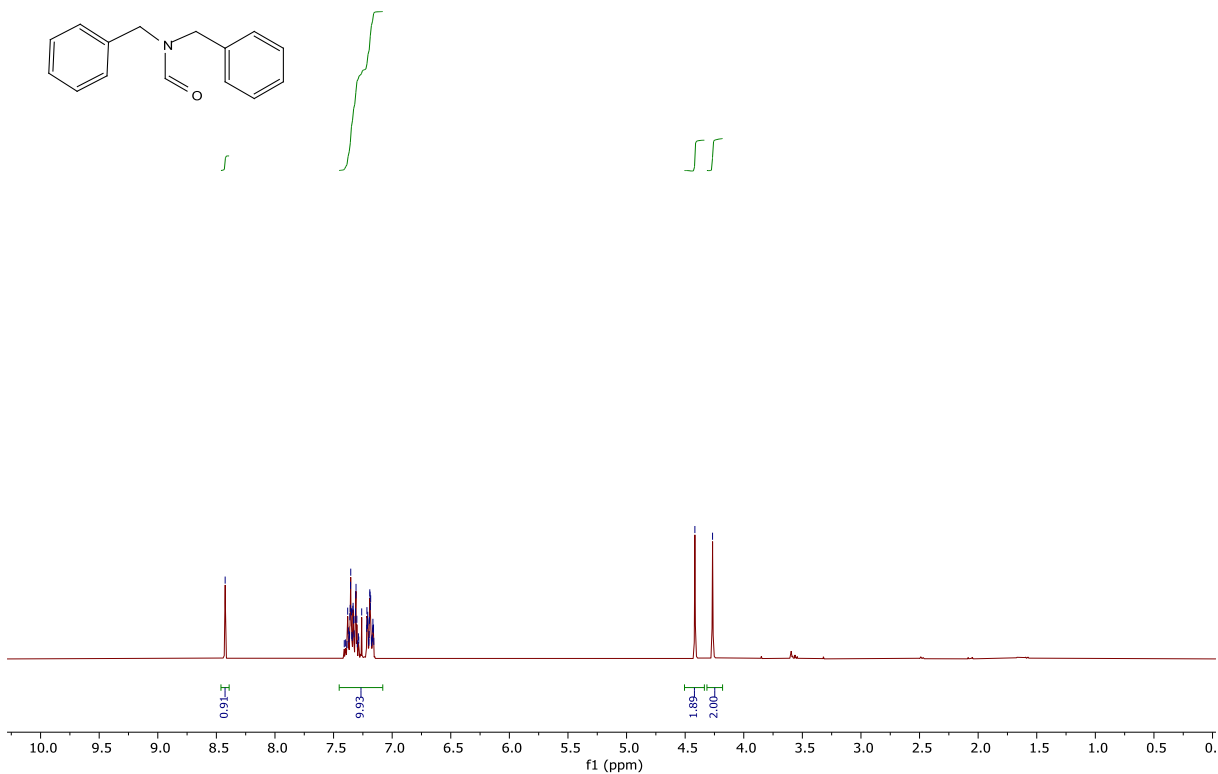

<sup>1</sup>H NMR of N,N-dibenzylformamide (3q)

220223.329.10.fid  
Ren Changyue CY-466  
Au1H CDCl3 {C:\Bruker\TopSpin3.6.2} 2202 29

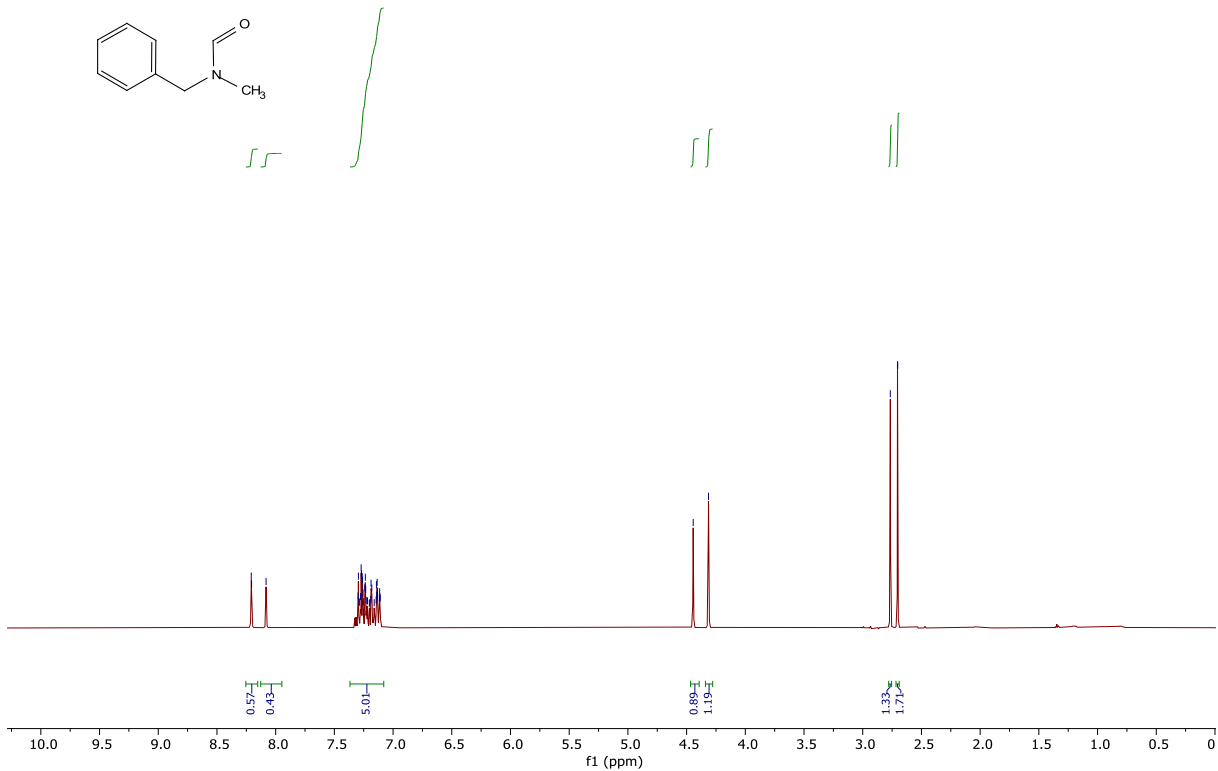

<sup>1</sup>H NMR of N-benzyl-N-methylformamide (3o)



230203.f315.10.fid  
 Ren Changyue CY-614  
 PROTON CDCl3 {C:\Bruker\TopSpin3.6.2} 2302 15

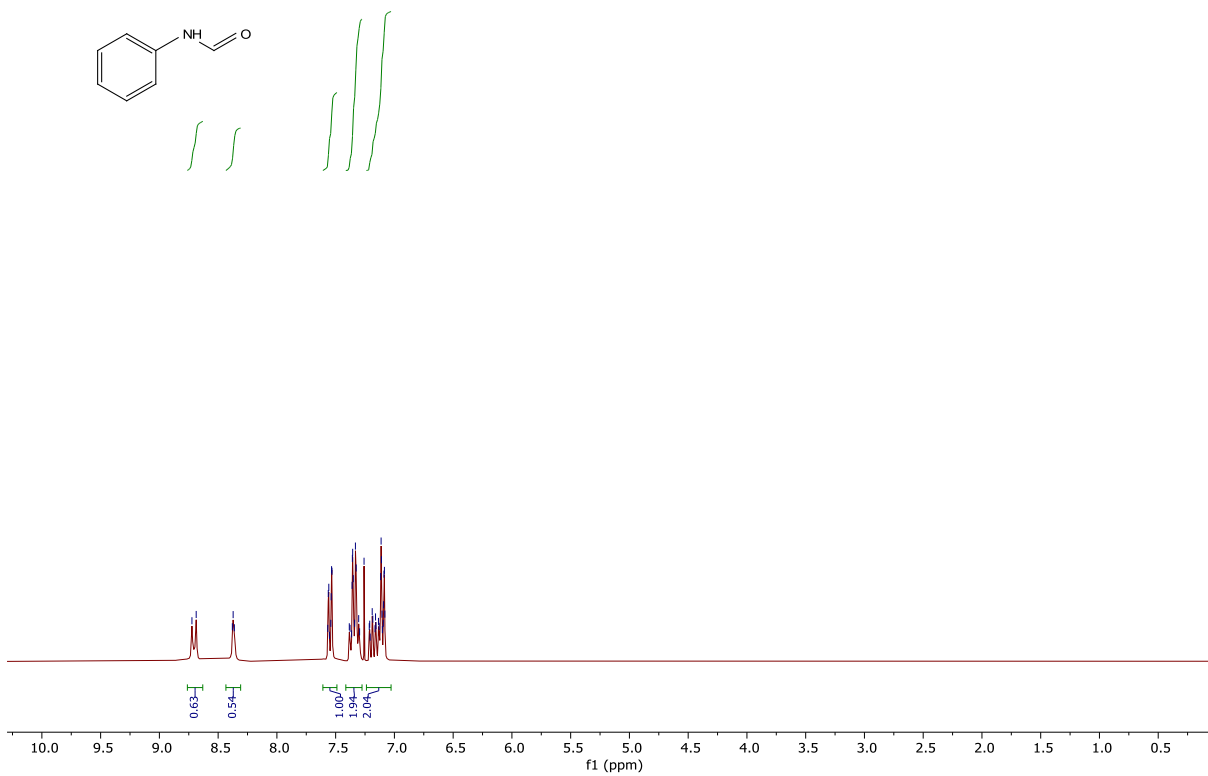

<sup>1</sup>H NMR of N-phenylformamide (3t)

22121538304.0.fid  
 Ren CY-614  
 Au1H CDCl3 {C:\Bruker\TopSpin3.6.2} 2212 3

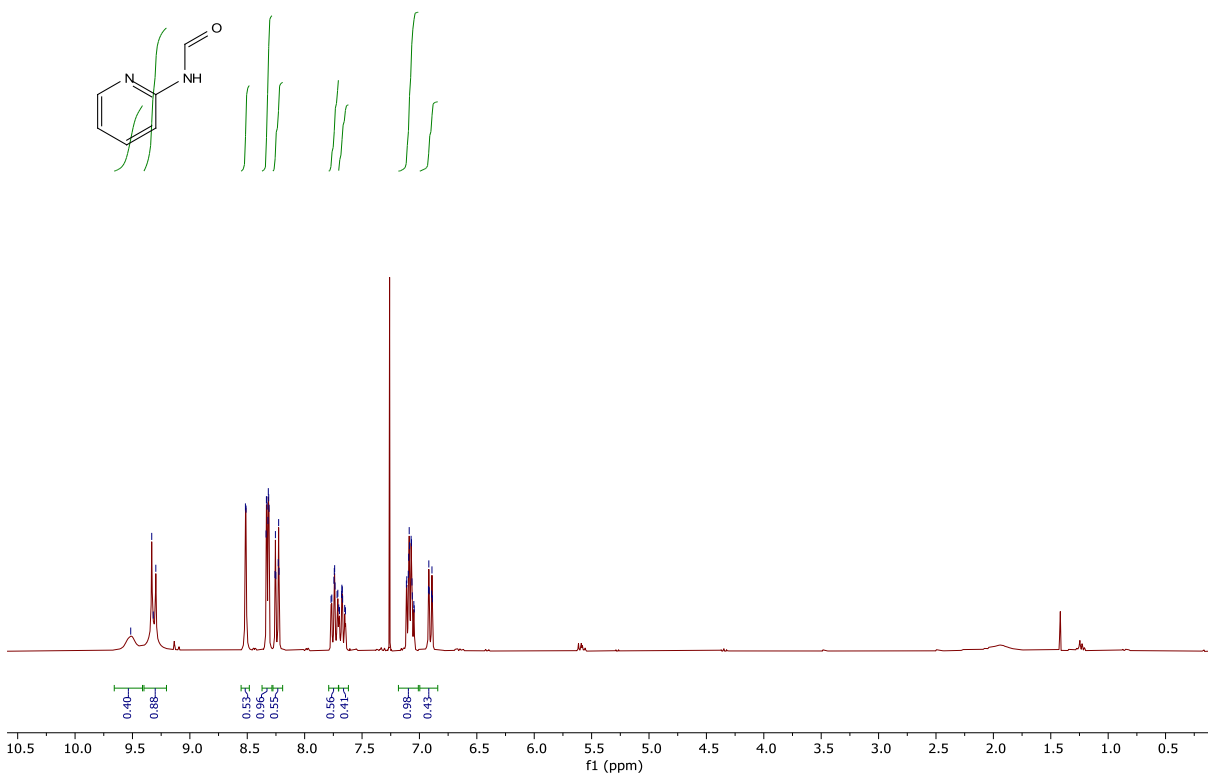

<sup>1</sup>H NMR of N-(pyridin-2-yl)formamide (3u)

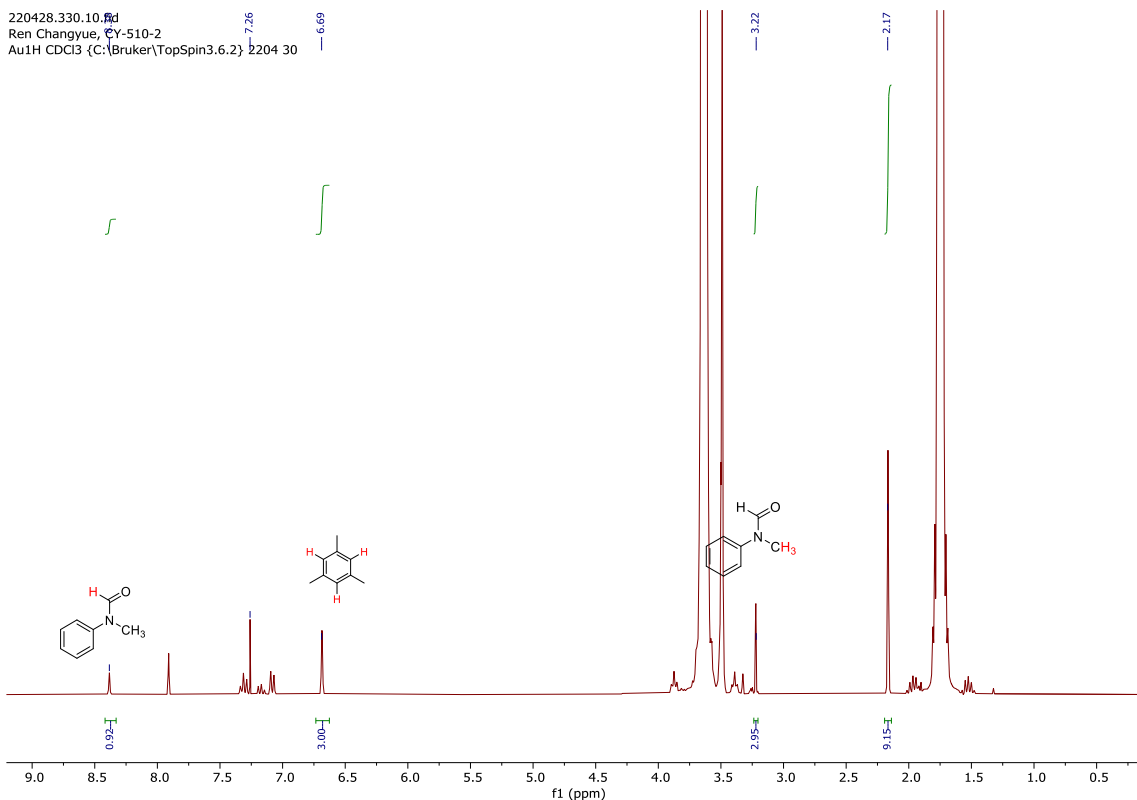

The  $^1\text{H}$  NMR spectra of the reaction between *N*-methylaniline and  $\text{CO}_2$  under optimal condition to give *N*-methylformanilide (**3a**).

## 5. Synthesis of benzoheterocyclic compounds 5

**General procedure (GP3) for the synthesis of benzoheterocyclic compounds 5:** A 45  $\text{cm}^3$  stainless-steel autoclave charging with catalyst catalyst (2.0 mol%) and aniline **4** (0.600 mmol), trimethoxysilane (1.80 mmol, 220 mg), 6 mL THF. The autoclave was purged with  $\text{CO}_2$  and the pressure kept constant at 1.0 bar. The reaction mixture was stirred at 70  $^\circ\text{C}$  for 24 h. Subsequently the  $\text{CO}_2$  was released slowly. Then the residue was purified by silica gel chromatography (hexane/ethyl acetate = 1/1) to afford the corresponding products **5**.

According to the GP3, *o*-phenylenediamine (**4a**, 64.9 mg, 0.600 mmol), catalyst (4.23 mg, 12.0  $\mu\text{mol}$ ), trimethoxysilane (220 mg, 1.80 mmol) and  $\text{CO}_2$  were converted at 70  $^\circ\text{C}$ , 1.0 bar for 24 h to yield 1*H*-benzo[*d*]imidazole **5a** (58.8 mg, 0.498 mmol, 83%) as a colorless solid.  $^1\text{H}$  NMR (300 MHz,  $\text{CDCl}_3$ )  $\delta$  8.11 (s, 1H), 7.79 – 7.59 (m, 2H), 7.35 – 7.28 (m, 2H), 6.28 (s, 1H).<sup>[4]</sup>

According to the GP3, 4-methoxybenzene-1,2-diamine (**4b**, 82.9 mg, 0.600 mmol), catalyst (4.23 mg, 12.0  $\mu\text{mol}$ ), trimethoxysilane (220 mg, 1.80 mmol) and  $\text{CO}_2$  were converted at 70  $^\circ\text{C}$ , 1.0 bar for 24 h to yield 6-methoxy-1*H*-benzo[*d*]imidazole **5b** (41.6 mg, 0.282 mmol, 47%) as a yellow oil.  $^1\text{H}$  NMR (300 MHz,  $\text{CDCl}_3$ )  $\delta$  8.04 (s, 1H), 7.55 (d,  $J = 8.8$  Hz, 1H), 7.10 (d,  $J = 0.6$  Hz, 1H), 6.93 (dd,  $J = 8.8, 2.4$  Hz, 1H), 3.82 (s, 3H).<sup>[6]</sup>

According to the GP3, *N*-methylbenzene-1,2-diamine (**4c**, 73.3 mg, 0.600 mmol), catalyst (4.23 mg, 12.0  $\mu\text{mol}$ ), trimethoxysilane (220 mg, 1.80 mmol) and  $\text{CO}_2$  were converted at 70  $^\circ\text{C}$ , 1.0 bar for 24 h to yield 1-methyl-1*H*-benzo[*d*]imidazole **5c** (49.3 mg, 0.372 mmol, 62%) as a red oil.  $^1\text{H}$  NMR (300 MHz,  $\text{CDCl}_3$ )  $\delta$  7.94 (s, 1H), 7.88 – 7.74 (m, 1H), 7.45 – 7.27 (m, 3H), 3.87 (s, 3H).<sup>[4]</sup>

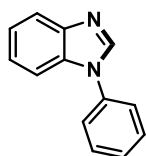

According to the GP3, *N*-phenylbenzene-1,2-diamine (**4d**, 110.6 mg, 0.600 mmol), catalyst (4.23 mg, 12.0  $\mu$ mol), trimethoxysilane (220 mg, 1.80 mmol) and CO<sub>2</sub> were converted at 70 °C, 1.0 bar for 24 h to yield 1-phenyl-1*H*-benzo[*d*]imidazole **5d** (81.5 mg, 0.420 mmol, 70%) as a red oil. <sup>1</sup>H NMR (400 MHz, CDCl<sub>3</sub>)  $\delta$  8.13 (s, 1H), 7.95 – 7.80 (m, 1H), 7.62 – 7.50 (m, 5H), 7.50 – 7.44 (m, 1H), 7.38 – 7.31 (m, 2H).<sup>[6]</sup>

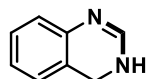

According to the GP3, 2-aminobenzylamine (**4e**, 73.3 mg, 0.600 mmol), catalyst (4.23 mg, 12.0  $\mu$ mol), trimethoxysilane (220 mg, 1.80 mmol) and CO<sub>2</sub> were converted at 70 °C, 1.0 bar for 24 h to yield 3,4-dihydroquinazoline **5e** (51.2 mg, 0.384 mmol, 64%) as a colorless solid. <sup>1</sup>H NMR (300 MHz, CDCl<sub>3</sub>)  $\delta$  8.17 (s, 1H), 7.15 – 7.01 (m, 2H), 6.77 – 6.62 (m, 2H), 5.97 (s, 1H), 4.40 (d, *J* = 6.3 Hz, 2H).

221214.308.10.fid  
Ren/ CY-617  
Au1H CDCl3 {C:\Bruker\TopSpin3.6.2\221214

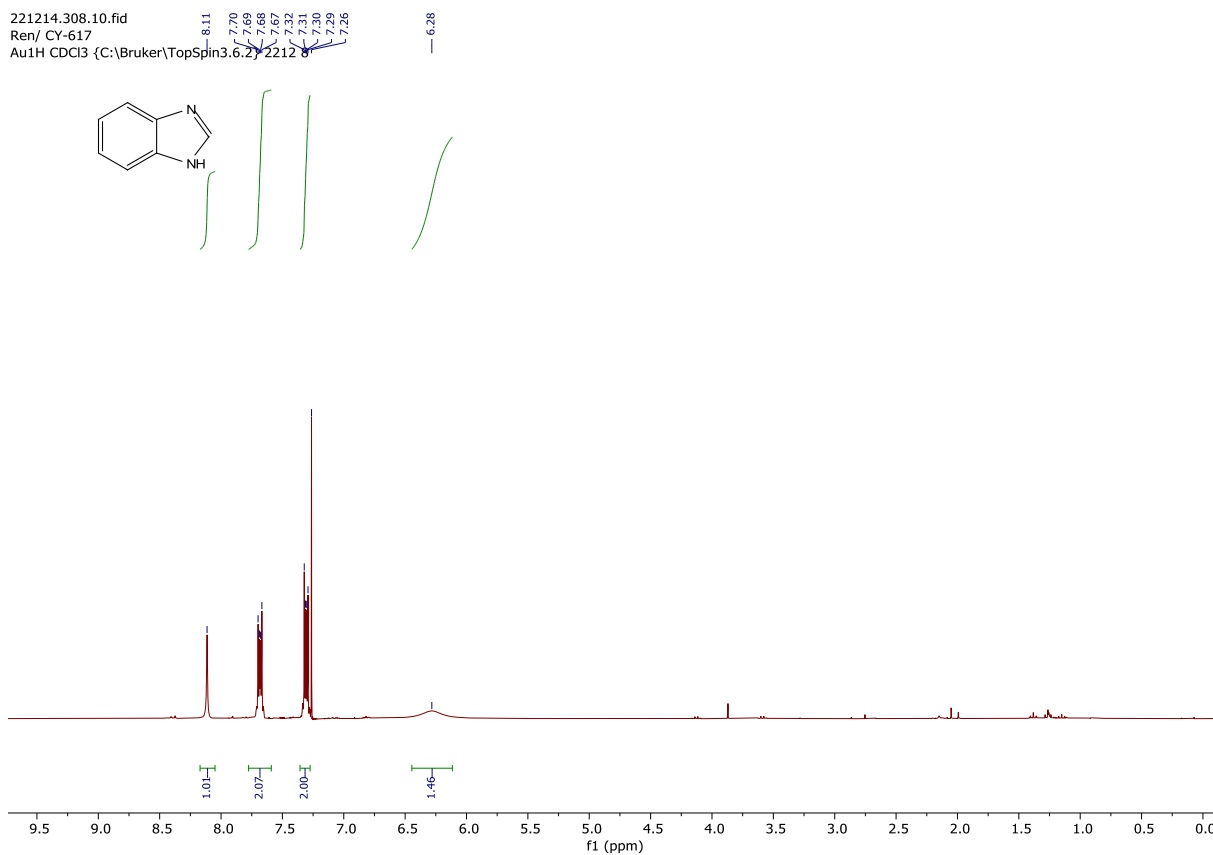

<sup>1</sup>H NMR of 1*H*-benzo[*d*]imidazole (**5a**)

230201.321.10.fid  
Ren Changyue, CY-632-3  
Au1H CDCl3 {C:\Bruker\TopSpin3.6.2} 2302 21

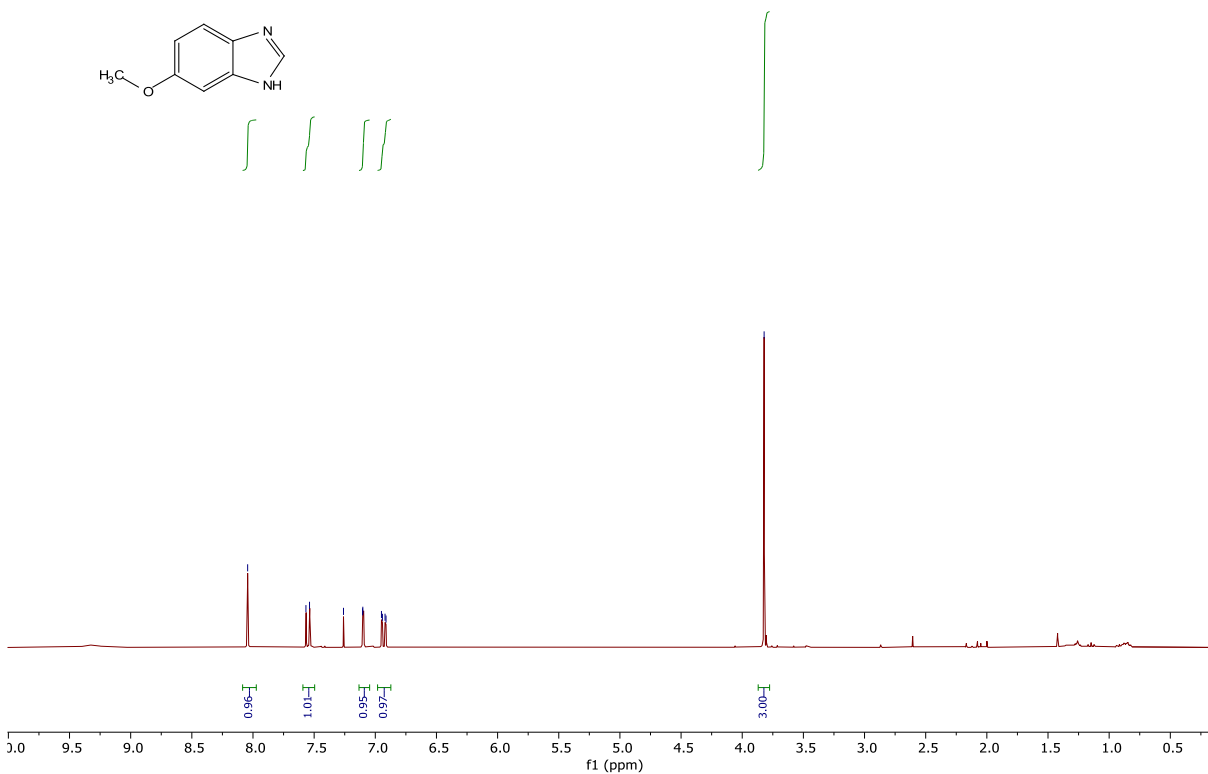

<sup>1</sup>H NMR of 6-methoxy-1H-benzo[d]imidazole (5b)

230118.343.10.fid  
Ren Changyue, CY-626  
Au1H CDCl3 {C:\Bruker\TopSpin3.6.2} 2301 43

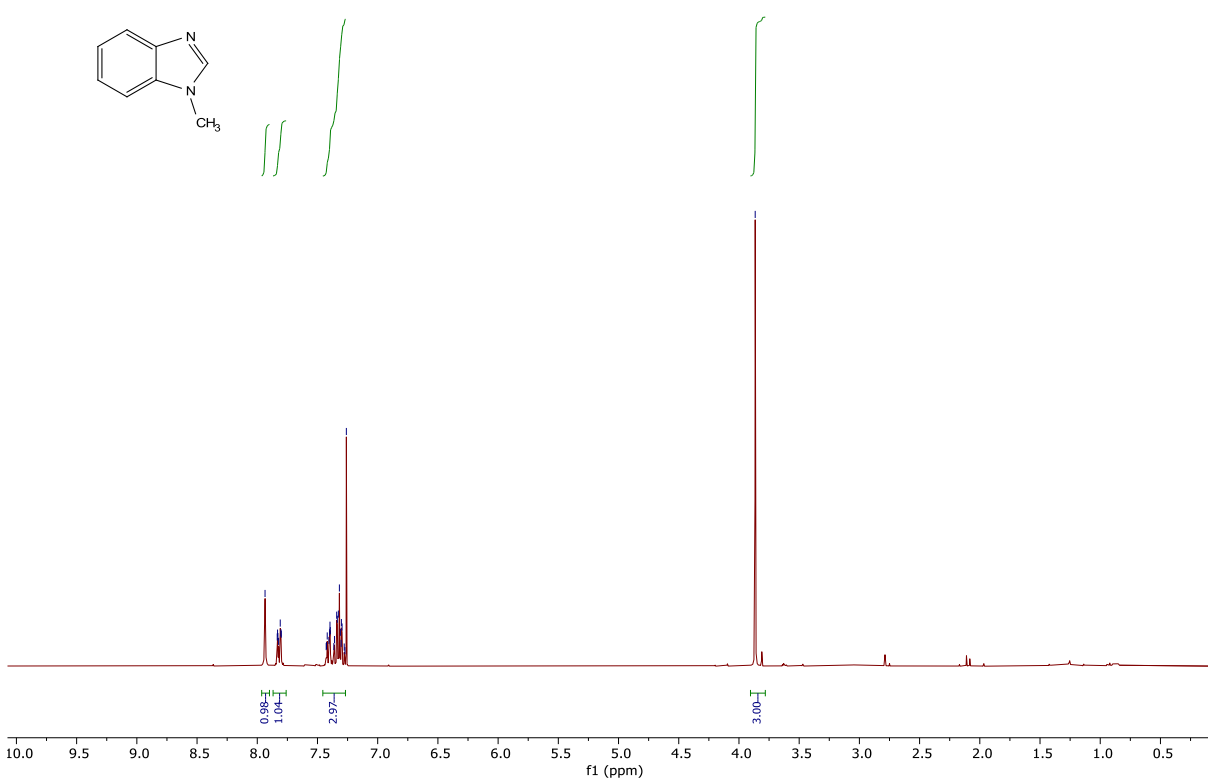

<sup>1</sup>H NMR of 1-methyl-1H-benzo[d]imidazole (5c)

230113.403.10.fid  
 Ren Changyue CY-624  
 Au1H CDCl3 {C:\Bruker\TopSpin3.6.2} 230113

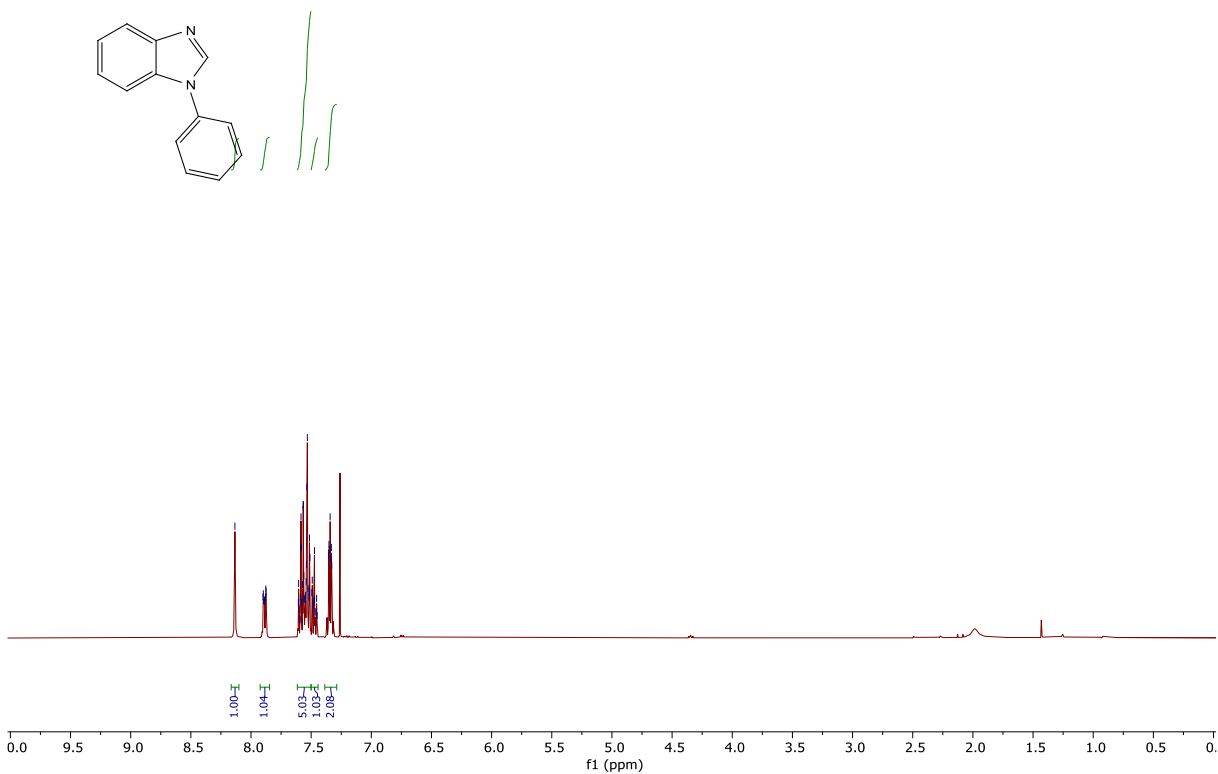

2212213181660  
 C. Ren CY-622  
 Au1H CDCl3 {C:\Bruker\TopSpin3.6.2} 221218

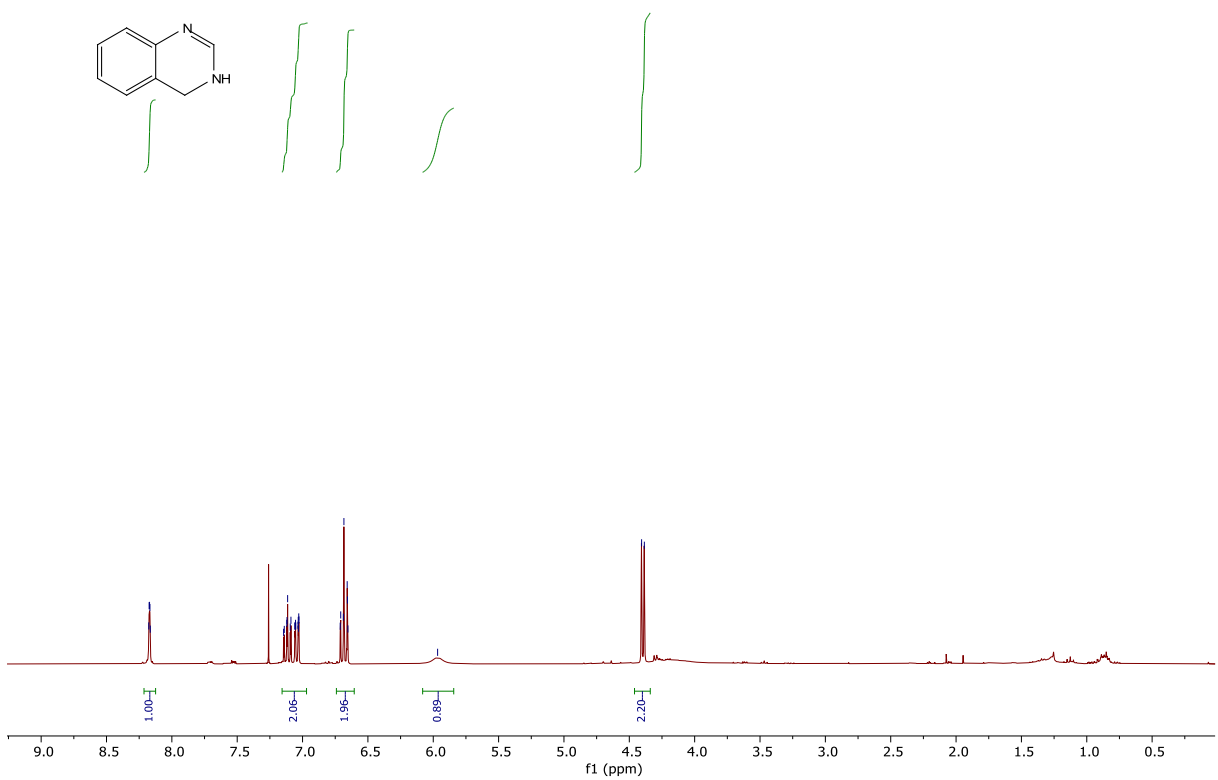

## 6. Mechanistic studies

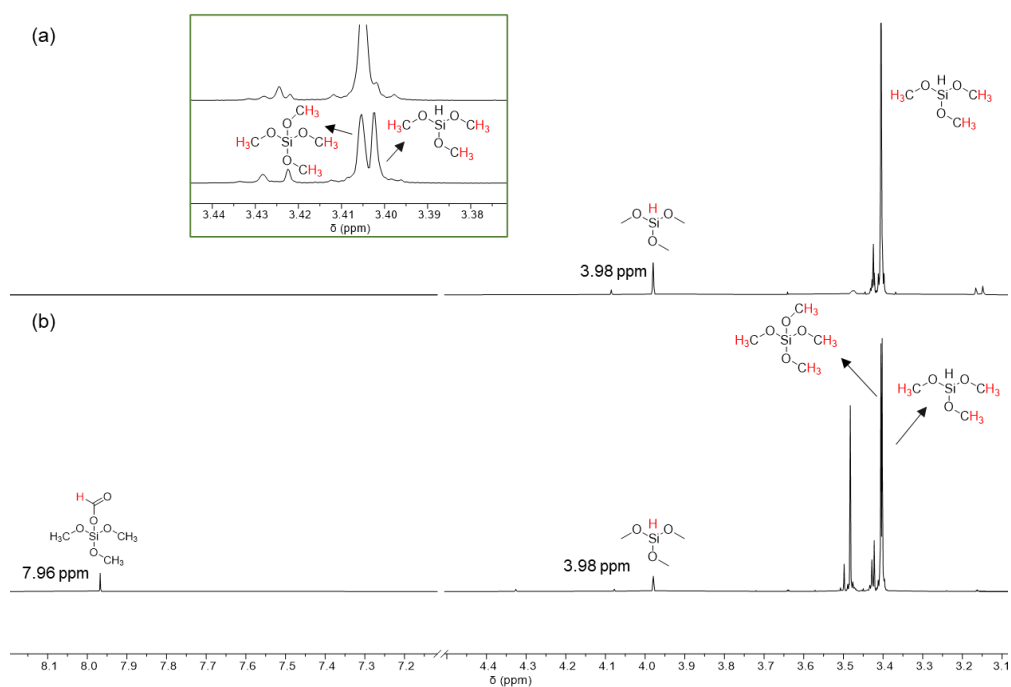

**Figure S1.**  $^1\text{H}$  NMR of the control experiments shown in Scheme 2a. (a) Before the reaction. (b) After the reaction. Reaction conditions:  $(\text{MeO})_3\text{SiH}$  (131.4 mg, 1.08 mmol), catalyst (1.89 mg, 2 mol%),  $p(\text{CO}_2) = 1$  bar,  $70^\circ\text{C}$ , 16 h,  $\text{THF-d}^8$ .

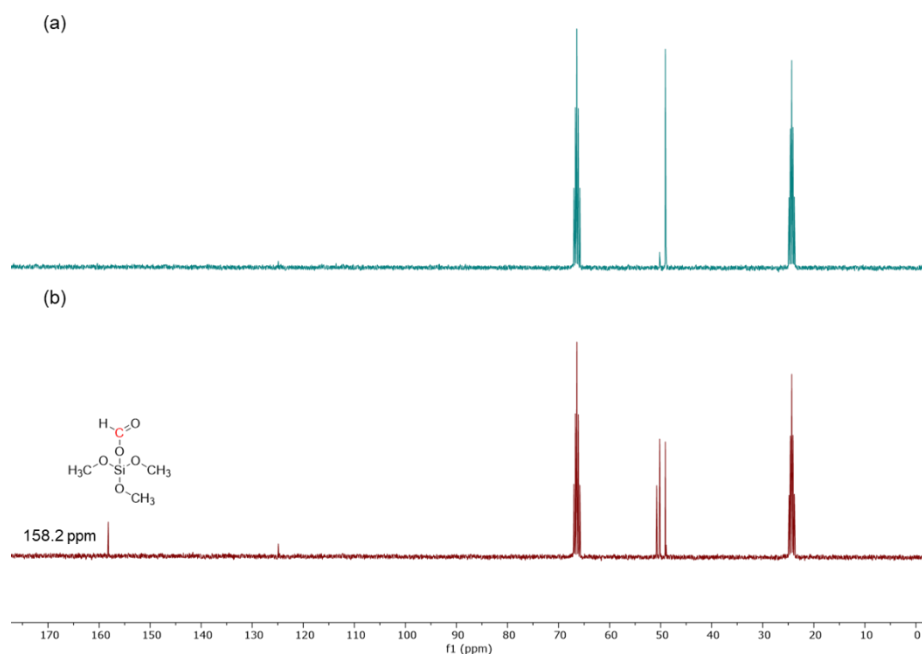

**Figure S2.** The  $^{13}\text{C}$  NMR of the control experiments shown in Scheme 2a. (a) Before the reaction. (b) After the reaction. Reaction conditions: see Figure S1.

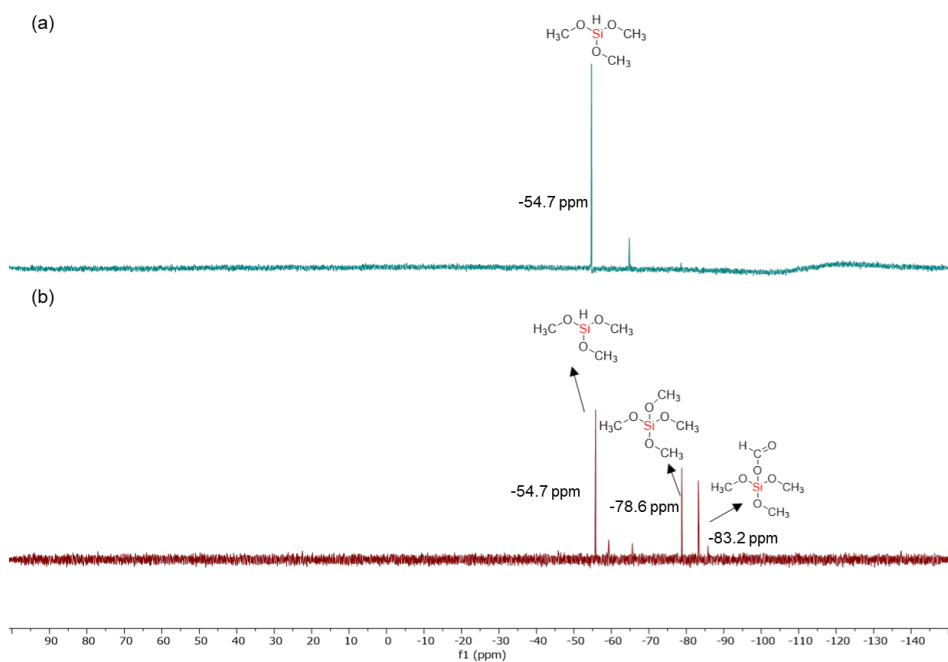

**Figure S3.** The  $^{29}\text{Si}$  NMR data of the control experiments shown in Scheme 2a. (a) Before the reaction. (b) After the reaction. Reaction conditions: see Figure S1.

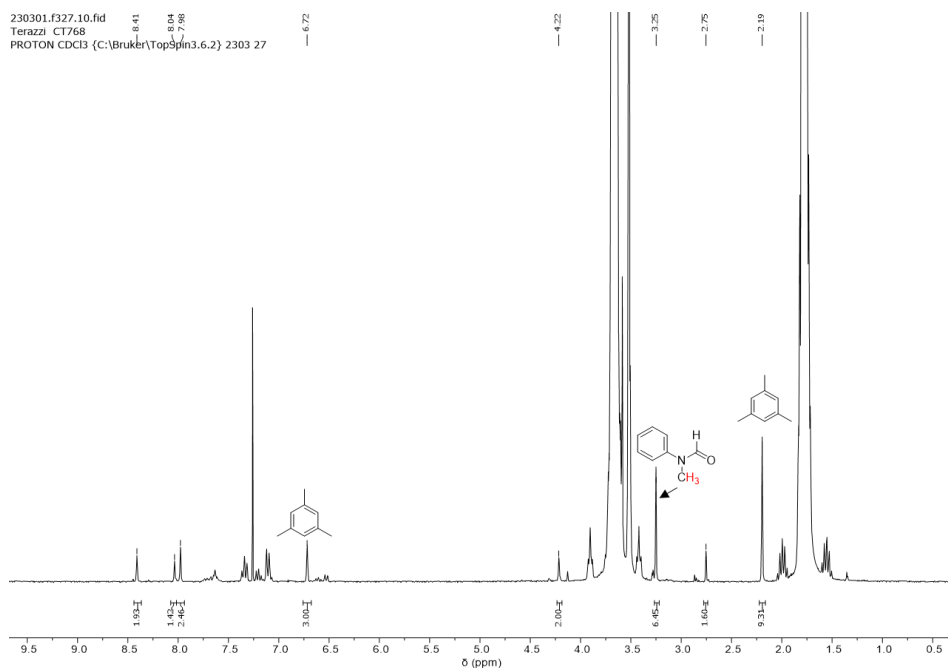

**Figure S4.**  $^1\text{H}$  NMR data of the control experiments shown in Scheme 2b in  $\text{CDCl}_3$ . Reaction condition: To the reaction mixture of Scheme 2a *N*-methylaniline (28.8 mg, 0.27 mmol) was added and reacted under Argon at  $70^\circ\text{C}$  for 6 h. For the quantification methylene (11.5 mg, 0.10 mmol) were used as internal standard.

**Table S1.** The yield of aminal over time.

CNc1ccccc1 + PMHS + CO<sub>2</sub>  $\xrightarrow[\text{THF}]{\text{catalyst 2 mol\%, 60 }^\circ\text{C, T, p(CO}_2\text{)} = 1 \text{ bar}}$  CN(Cc1ccccc1)c2ccccc2

| entry | Time (h) | Yield aminal (%) |
|-------|----------|------------------|
| 1     | 1        | 6                |
| 2     | 2        | 9                |
| 3     | 8        | 1                |

Reaction conditions: N-methylaniline 1a (0.233 mmol, 25.0 mg), PMHS (4–10 equiv.), catalyst: 10 mol% (0.0233 mmol, 8.22 mg), CO<sub>2</sub> = 1 bar, 60 °C for 16 h, THF (2 mL). Yield was determined by <sup>1</sup>H-NMR using mesitylene as the internal standard.

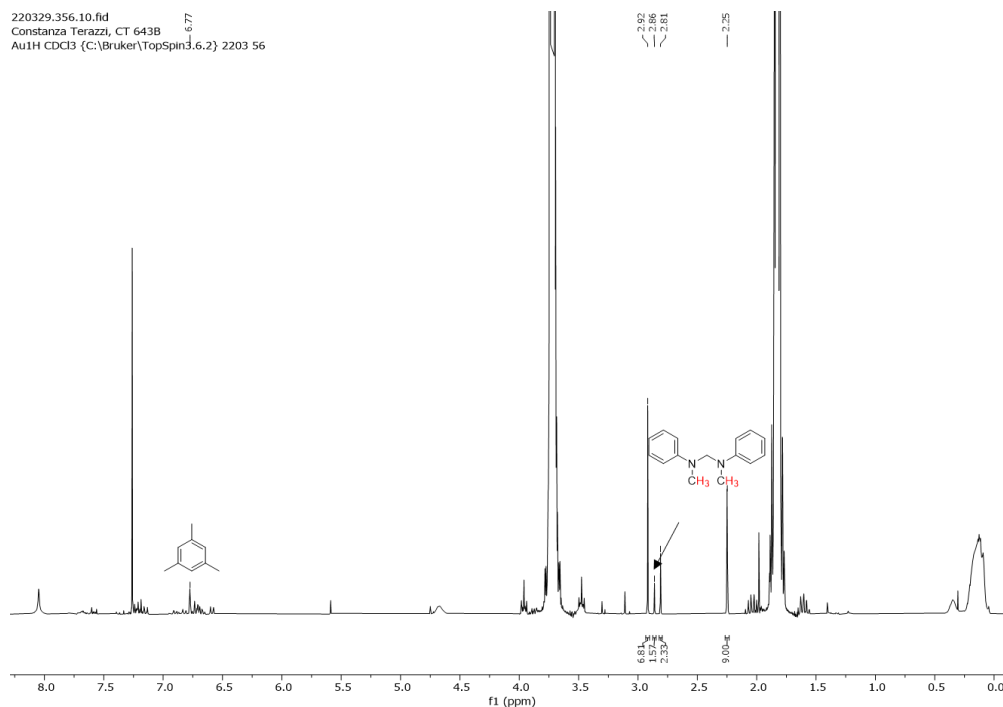

**Figure S5.** <sup>1</sup>H NMR for the quantification of aminal formation using mesitylene as internal standard (Table S1 entry 2). Reaction conditions: see Table S1.



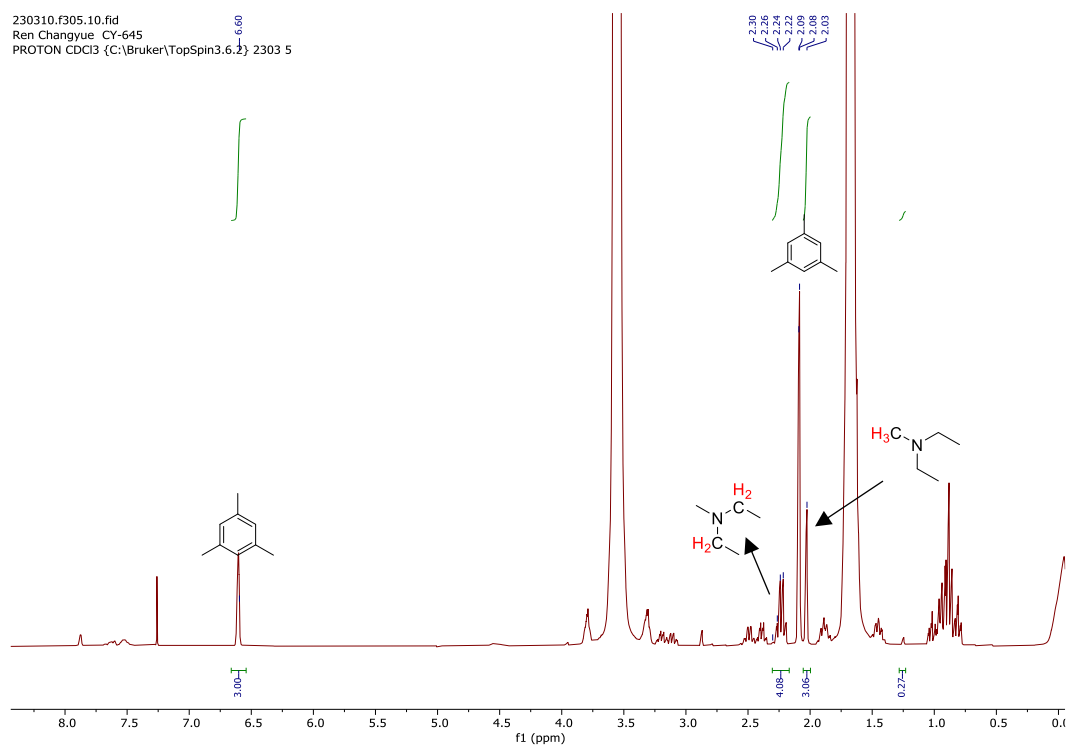

**Figure S6.**  $^1\text{H}$  NMR data of the control experiments shown in Scheme 4b. Reaction conditions: *N,N,N',N'*-tetraethylmethanediamine (0.500 mmol, 79.1 mg), PMHS (2.00 mmol, 138 mg), catalyst 2b: 10 mol% (17.6 mg),  $\text{CO}_2 = 1$  bar,  $70^\circ\text{C}$ , 16 h. THF: 2 mL. The yield of *N,N*-diethylmethanamine from TEMDA was determined using mesitylene as internal standard.<sup>[7]</sup>

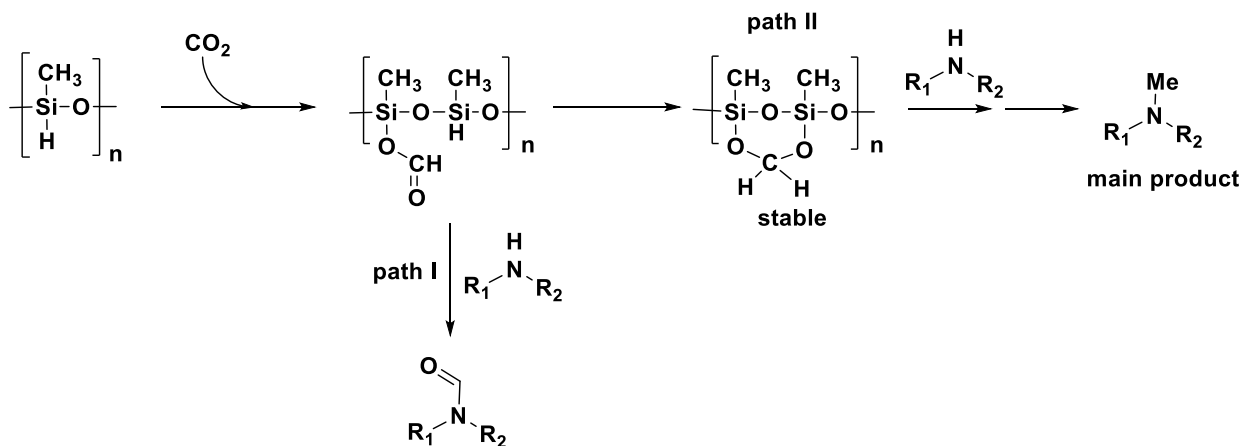

**Scheme S1.** The speculated pathway of reaction in the presence of PMHS.

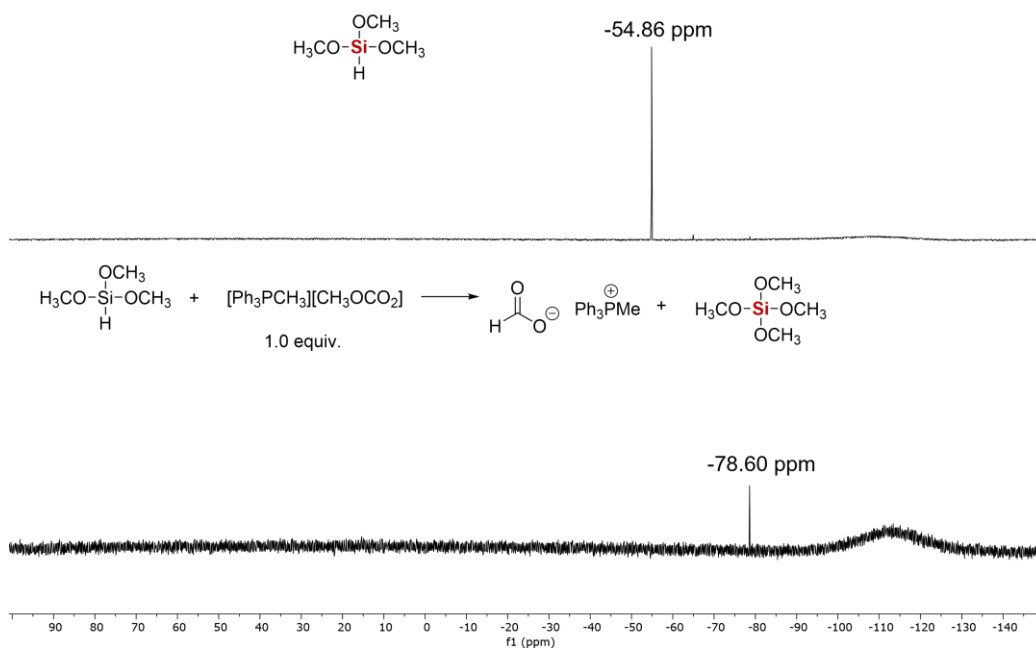

**Figure S7.**  $^{29}\text{Si}$  NMR of the reaction between trimethoxysilane and the catalyst in the absence of  $\text{CO}_2$ . Reaction conditions: catalyst (24.7 mg, 0.0700 mmol),  $(\text{OMe})_3\text{SiH}$  (8.55, 0.0700 mmol),  $\text{CDCl}_3$  0.4 mL, at 70 °C under Argon for 16 h.<sup>[8]</sup>

## 7. References

- [1] L. Cattelan, M. Noè, M. Selva, N. Demitri, A. Perosa, *ChemSusChem* **2015**, *8*, 3963–3966.
- [2] Z. Huang, X. Jiang, S. Zhou, P. Yang, C.-X. Du, Y. Li, *ChemSusChem* **2019**, *12*, 3054–3059.
- [3] Q. Zou, G. Long, T. Zhao, X. Hu, *Green Chem.*, **2020**, *22*, 1134–1138.
- [4] X. Jiang, Z. Huang, M. Makha, C.-X. Du, D. Zhao, F. Wang, Y. Li, *Green Chem.*, **2020**, *22*, 5317–5324.
- [5] J. Yin, J. Zhang, C. Cai, G.-J. Deng, H. Gong, *Org. Lett.* **2019**, *21*, 387–392.
- [6] X. Zhu, F. Zhang, D. Kuang, G. Deng, Y. Yang, J. Yu, Y. Liang, *Org. Lett.* **2020**, *22*, 3789–3793.
- [7] F. Zhang, C. Guo, M. Gong, H. Xie, Y. Luo, *New J. Chem.* **2022**, *46*, 779–791.
- [8] D. Braddock, P. Lickiss, B. Rowley, D. Pugh, T. Purnomo, G. Santhakumar, and S. Fussell, *Org. Lett.* **2018**, *20*, 950–953.
